# Supplementary material for: Silver Nanoparticles Stabilized with Phosphorus-Containing Heterocyclic Surfactants: Synthesis, Physico-Chemical Properties, and Biological Activity Determination
Source: MDPI journal article supplement (doi:10.3390/nano11081883), 2021-07-22

# Supplementary Material

## Silver Nanoparticles Stabilized with Phosphorus-Containing Heterocyclic Surfactants: Synthesis, Physico-Chemical Properties, and Biological Activity Determination

Martin Pisárčik <sup>1,\*</sup>, Miloš Lukáč <sup>1</sup>, Josef Jampílek <sup>2</sup>, František Bilka <sup>3</sup>, Andrea Bilková <sup>3</sup>, Ludmila Pašková <sup>3</sup>, Ferdinand Devínsky <sup>4</sup>, Renáta Horáková <sup>5</sup>, Matěj Březina <sup>6</sup> and Tomáš Opravil <sup>6</sup>

- <sup>1</sup> Department of Chemical Theory of Drugs, Faculty of Pharmacy, Comenius University, SK-83232 Bratislava, Slovakia; lukac@fpharm.uniba.sk
- <sup>2</sup> Department of Analytical Chemistry, Faculty of Natural Sciences, Comenius University, SK-84215 Bratislava, Slovakia; josef.jampilek@uniba.sk
- <sup>3</sup> Department of Cell and Molecular Biology of Drugs, Faculty of Pharmacy, Comenius University, SK-83232 Bratislava, Slovakia; bilka@fpharm.uniba.sk (F.B.); bilkova@fpharm.uniba.sk (A.B.); paskova@fpharm.uniba.sk (L.P.)
- <sup>4</sup> Faculty of Pharmacy, Comenius University, SK-83232 Bratislava, Slovakia; devinsky@fpharm.uniba.sk
- <sup>5</sup> Comenius University, SK-81499 Bratislava, Slovakia; renata.horakova@uniba.sk
- <sup>6</sup> Materials Research Centre, Faculty of Chemistry, University of Technology, CZ-61200 Brno, Czech Republic; brezina@fch.vut.cz (M.B.); opravil@fch.vutbr.cz (T.O.)
- \* Correspondence: pisarcik@fpharm.uniba.sk; Tel.: +421-2-50117329

### Contents

1. Dynamic light scattering measurements and data analysis
2. Zeta potential measurements
3. SEM high resolution images

## 1. Dynamic light scattering measurements and data analysis

Screenshots from DLS measurements were obtained using Brookhaven BIC analysis software ver. 6.3 for BI 9000AT digital correlator (DOS version). Five independent measurements were performed for each Ag/surfactant system and each silver-to-surfactant molar ratio value. For each Ag/surfactant system and each molar ratio, the first screenshot provides the image of the autocorrelation function, and the second screenshot provides the data analysis.

The hydrodynamic diameter values of AgNPs shown in the plots in the main article were calculated as the mean of the value Eff.Diam. shown in the second screenshot. This value is calculated from the Taylor series expansion of logarithm of autocorrelation function  $g^{(1)}(t)$  in terms of cumulants as follows:

$$\ln(g^{(1)}(t)) = -\bar{\Gamma} t + \frac{1}{2!} \mu_2 t^2 + \dots$$

$\mu_2$  is the second cumulant which would be near zero for a perfect single exponential decay. The decay rate  $\bar{\Gamma}$  was calculated from the expansion of the logarithm of time correlation function up to the second term using the first linear

term in the series for the  $\bar{\Gamma}$  calculation (Gam.Ave. in the screenshots). The diffusion coefficient  $D$  was determined from

the decay rate ( $\bar{\Gamma} = D q^2$ ) and the hydrodynamic diameter of AgNPs (Eff.Diam. in the screenshots) was calculated from the diffusion coefficient using the Stokes–Einstein formula

$$\text{Eff.Diam} = kT / (3\pi\eta D)$$

$\eta$  is solvent viscosity,  $k$  is the Boltzmann constant, and  $T$  is absolute temperature. Five independent measurements and calculations of time correlation function were carried out for each Ag/surfactant system and silver-to-surfactant molar ratio investigated. The mean value and standard deviation of Eff.Diam for each sample were calculated and plotted in the graphs.

To reduce the excessive number of screenshots in this supplementary material, just one independent measurement for each Ag/surfactant system and each silver-to-surfactant molar ratio value is shown.

## Screenshots section - DLS

Ag/14pl,  $n_{Ag}/n_{surf} = 8$

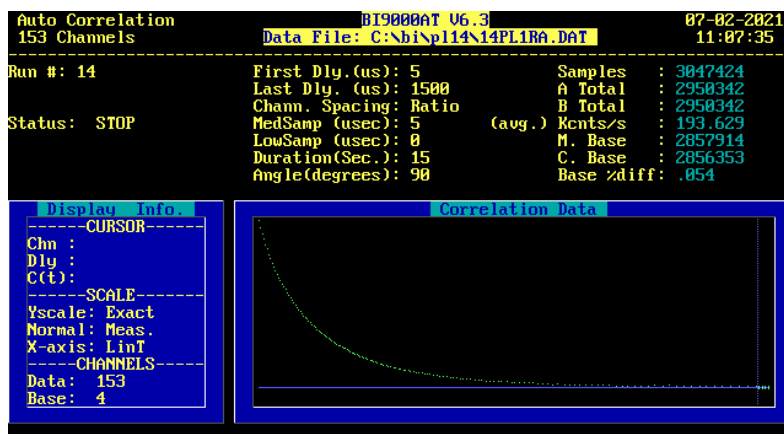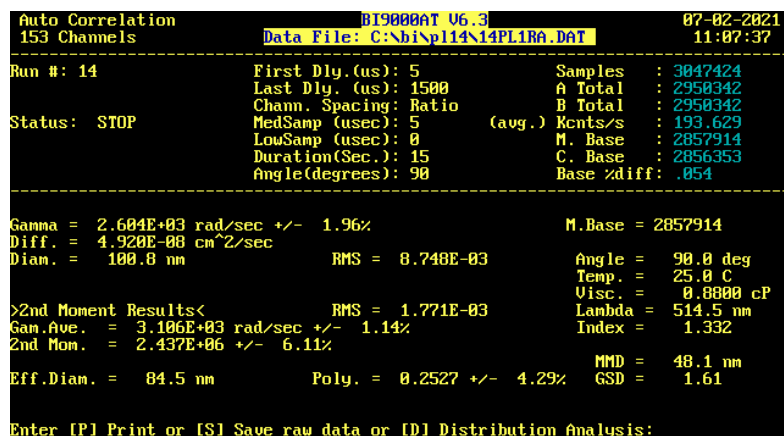

Ag/14pl,  $n_{Ag}/n_{surf} = 4$

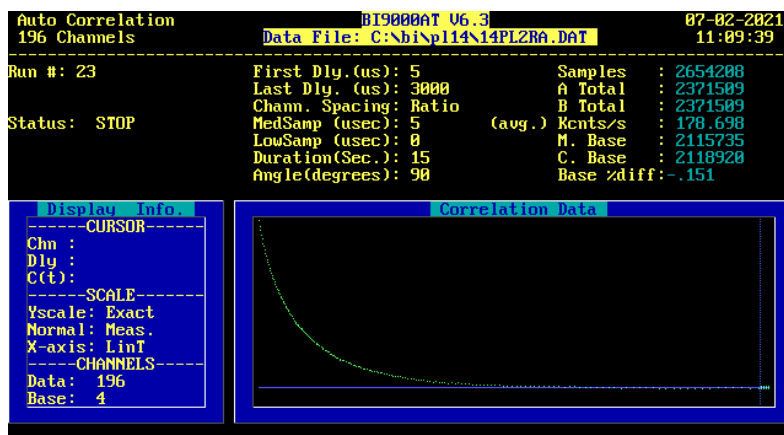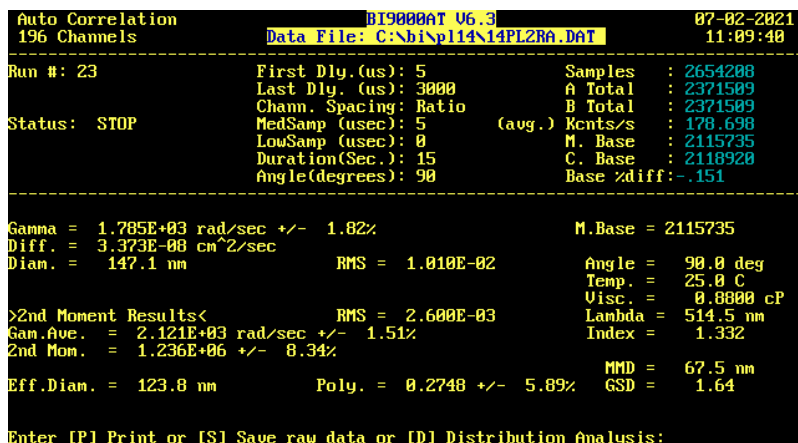

Ag/14pl,  $n_{Ag}/n_{Surf} = 2.7$

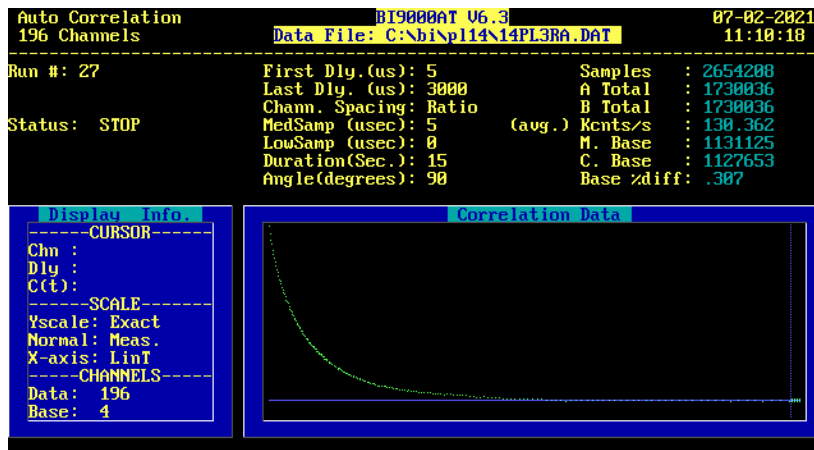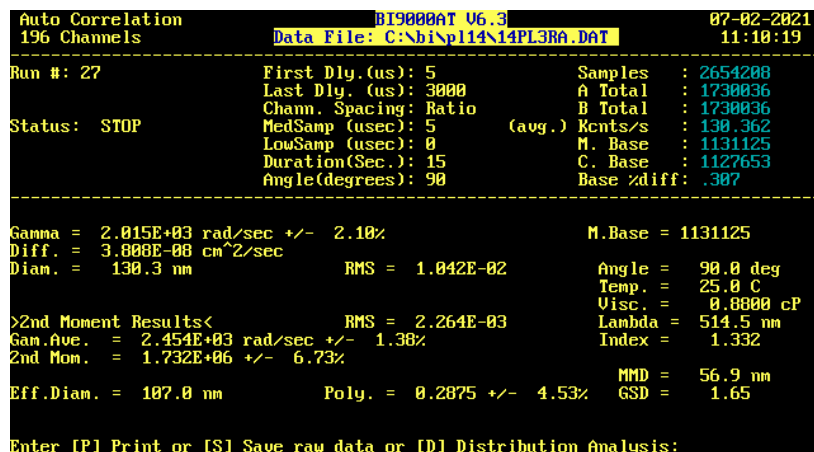

Ag/14pl,  $n_{Ag}/n_{Surf} = 2$

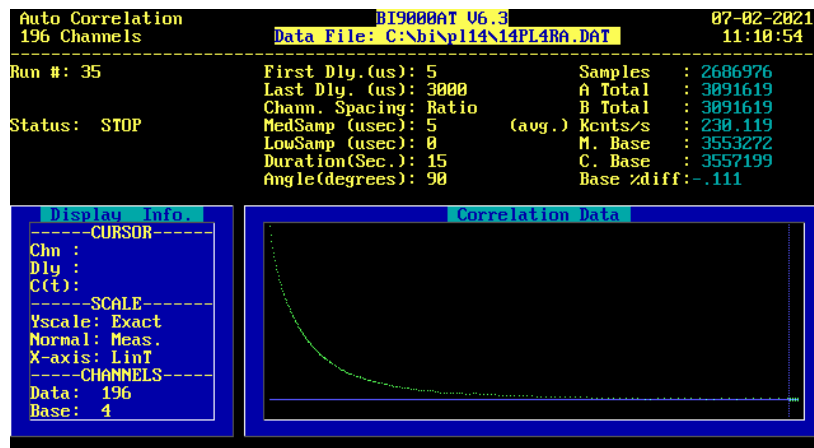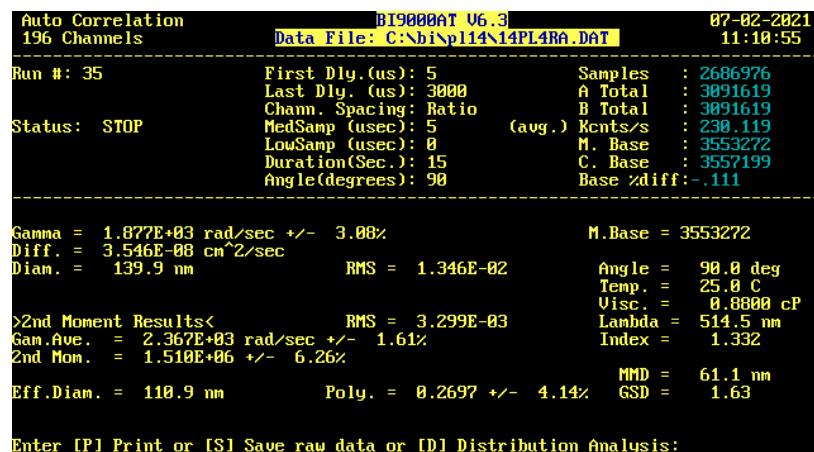

Ag/15pl,  $n_{Ag}/n_{Surf} = 8$

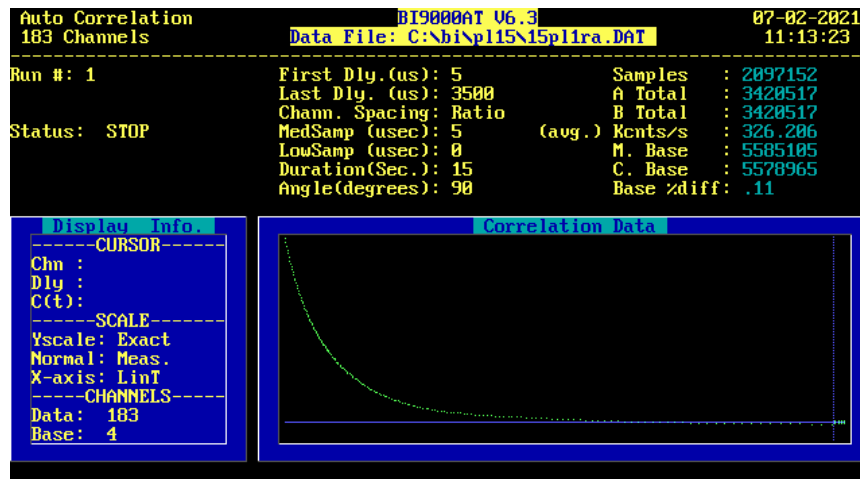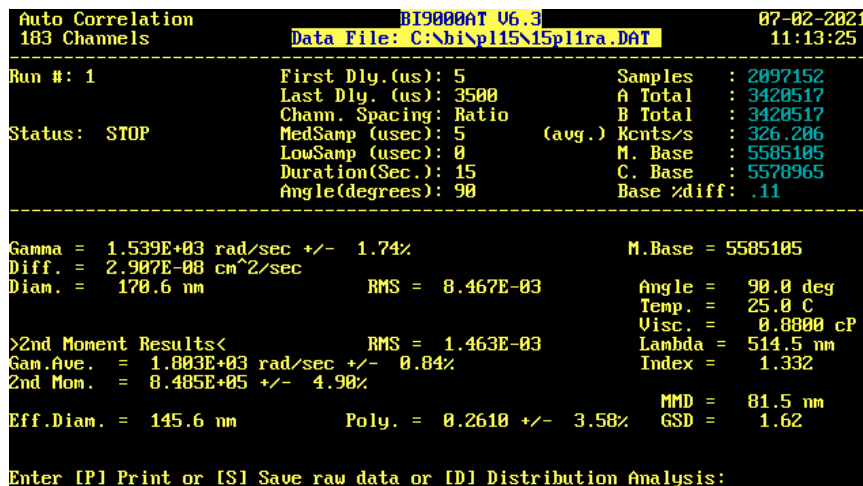

Ag/15pl,  $n_{Ag}/n_{Surf} = 4$

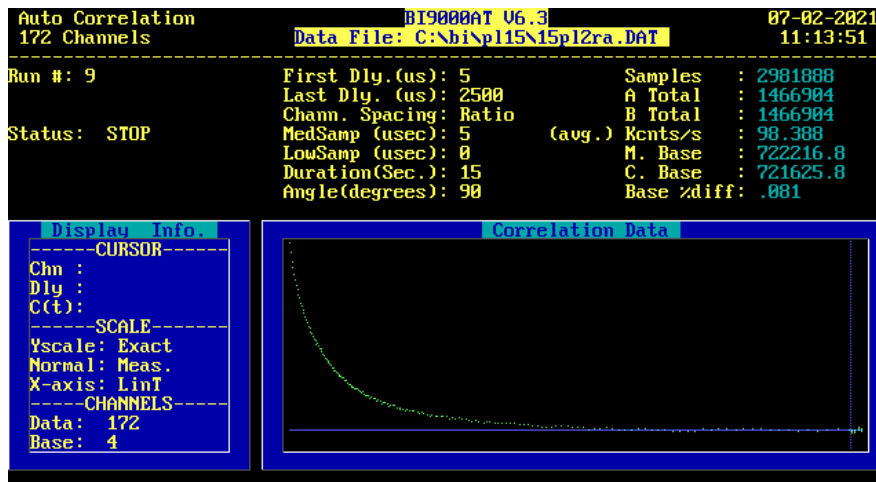

```

Auto Correlation          BI9000AT V6.3          07-02-2021
172 Channels              Data File: C:\bi\pl15\15pl2ra.DAT  11:13:52
-----
Run #: 9                  First Dly.(us): 5          Samples : 2981888
                          Last Dly. (us): 2500          A Total : 1466904
                          Chann. Spacing: Ratio        B Total : 1466904
Status: STOP              MedSamp (usec): 5          (avg.) Kcnts/s : 98.388
                          LowSamp (usec): 0            M. Base : 722216.8
                          Duration(Sec.): 15           C. Base : 721625.8
                          Angle(degrees): 90            Base %diff: .081
-----

Gamma = 2.188E+03 rad/sec +/- 3.32%          M.Base = 722216.8
Diff. = 4.134E-08 cm^2/sec                  Angle = 90.0 deg
Diam. = 120.0 nm                             RMS = 9.243E-03   Temp. = 25.0 C
                                              Visc. = 0.8800 cP
>2nd Moment Results<                      RMS = 2.236E-03   Lambda = 514.5 nm
Gam.Ave. = 2.885E+03 rad/sec +/- 2.19%      Index = 1.332
2nd Mom. = 2.761E+06 +/- 7.88%
Eff.Diam. = 91.0 nm                         Poly. = 0.3318 +/- 4.61%  MMD = 44.5 nm
                                              GSD = 1.71

Enter [P] Print or [S] Save raw data or [D] Distribution Analysis:

```

Ag/15pl,  $n_{Ag}/n_{surf} = 2.7$

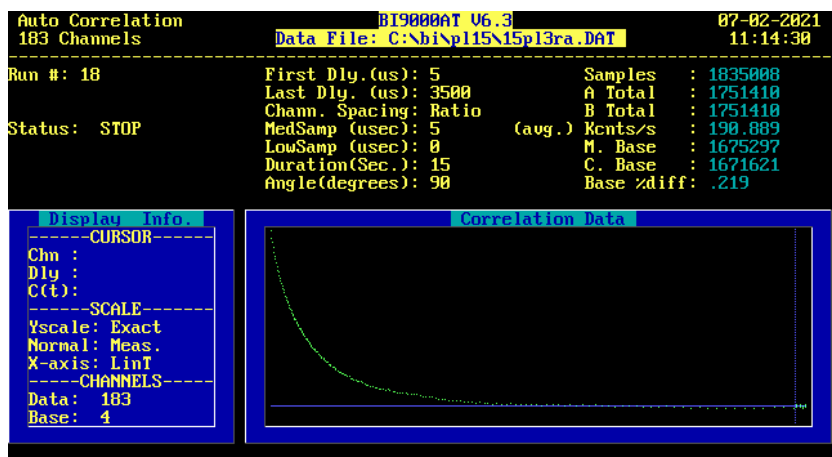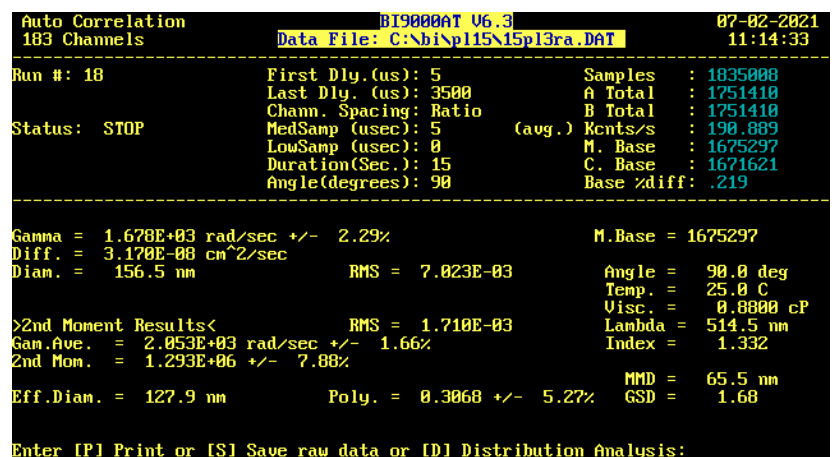

Ag/15pl,  $n_{Ag}/n_{surf} = 2$

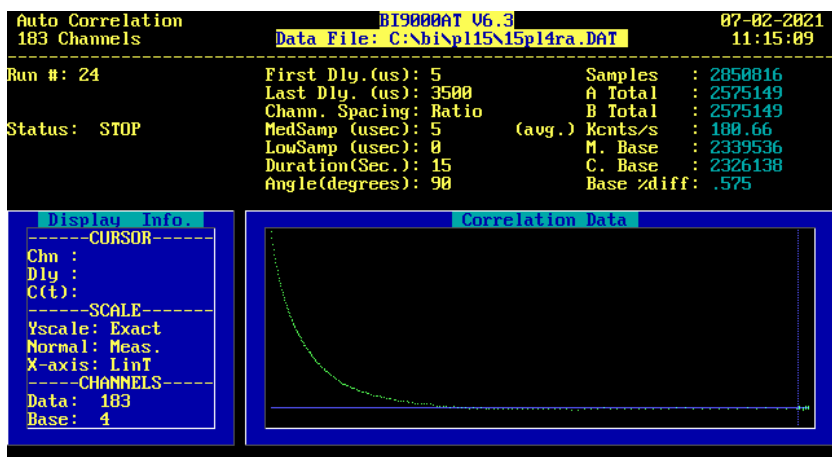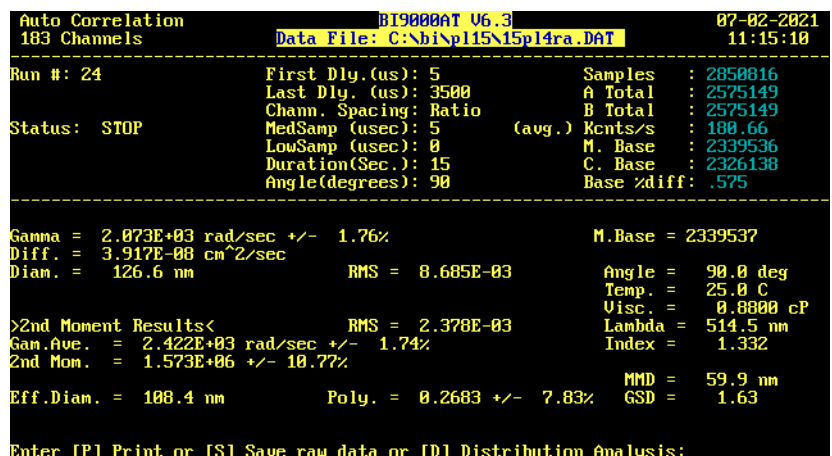

Ag/16pl,  $n_{Ag}/n_{Surf} = 8$

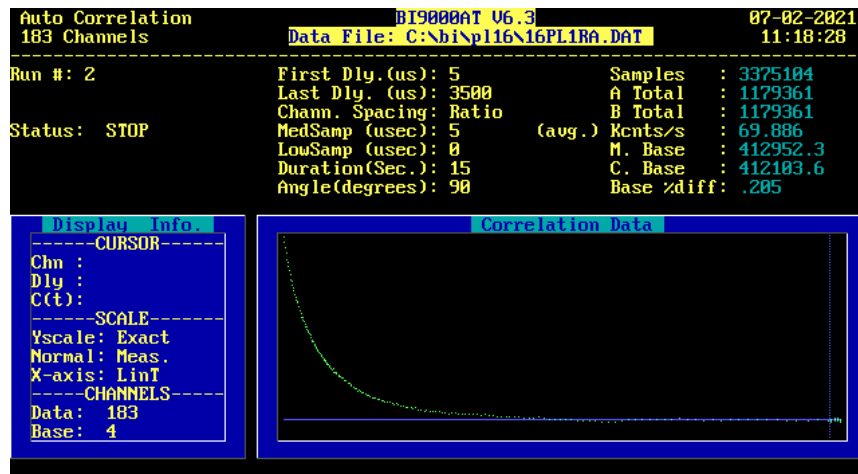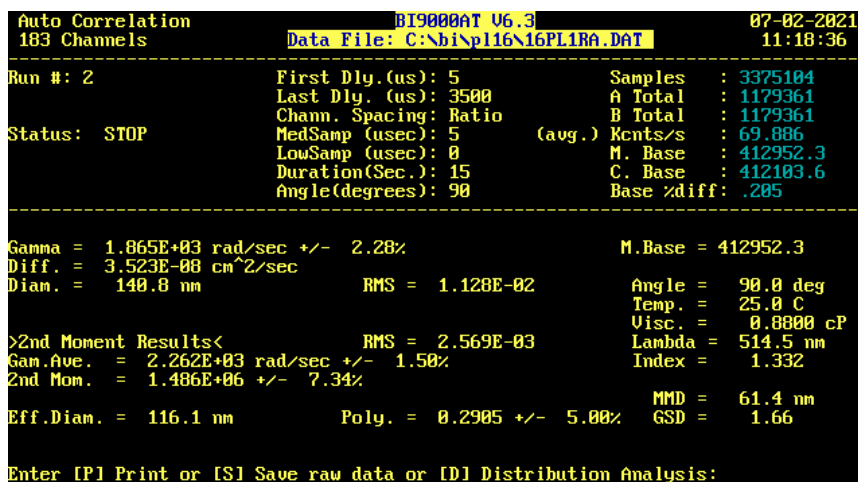

Ag/16pl,  $n_{Ag}/n_{Surf} = 4$

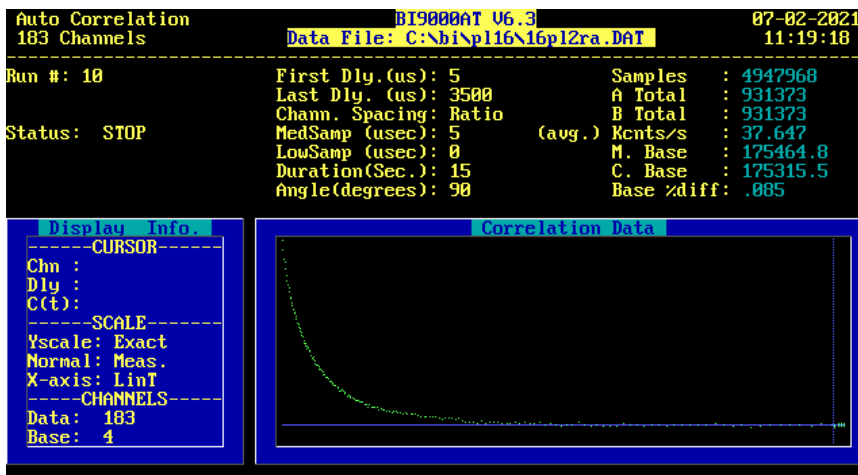



```

Auto Correlation      BI9000AT V6.3      07-02-2021
183 Channels          Data File: C:\bi\pl116\16pl2ra.DAT  11:19:14
-----
Run #: 10              First Dly.(us): 5              Samples : 4947968
                        Last Dly. (us): 3500             A Total : 931373
                        Chann. Spacing: Ratio             B Total : 931373
Status: STOP           MedSamp (usec): 5              (avg.) Kcnts/s : 37.647
                        LowSamp (usec): 0                M. Base : 175464.8
                        Duration(Sec.): 15                C. Base : 175315.5
                        Angle(degrees): 90                Base %diff: .085
-----

Gamma = 2.049E+03 rad/sec +/- 3.02%      M.Base = 175464.8
Diff. = 3.872E-08 cm^2/sec               Angle = 90.0 deg
Diam. = 128.1 nm                          RMS = 1.367E-02      Temp. = 25.0 C
                                           Visc. = 0.8800 cP
>2nd Moment Results<                    RMS = 3.493E-03      Lambda = 514.5 nm
Gam.Ave. = 2.606E+03 rad/sec +/- 2.06%   Index = 1.332
2nd Mom. = 2.134E+06 +/- 8.24%
Eff.Diam. = 100.7 nm                      Poly. = 0.3142 +/- 5.17%  MMD = 50.9 nm
                                           GSD = 1.69

Enter [P] Print or [S] Save raw data or [D] Distribution Analysis:

```

Ag/16pl,  $n_{Ag}/n_{Surf} = 2.7$

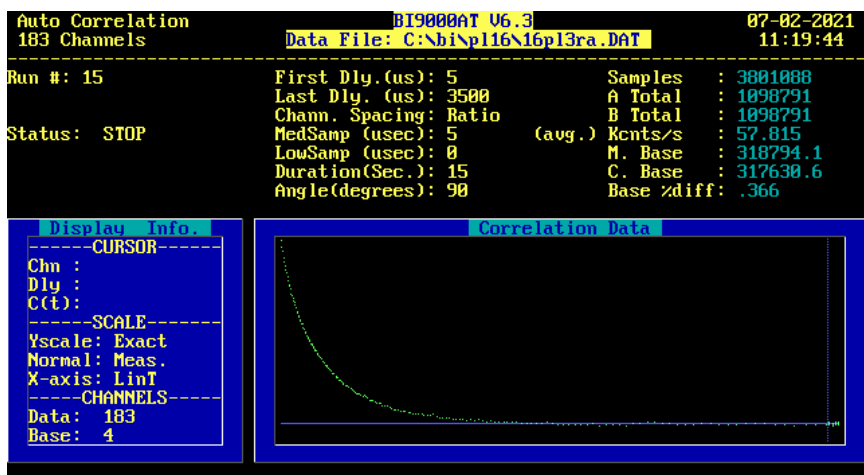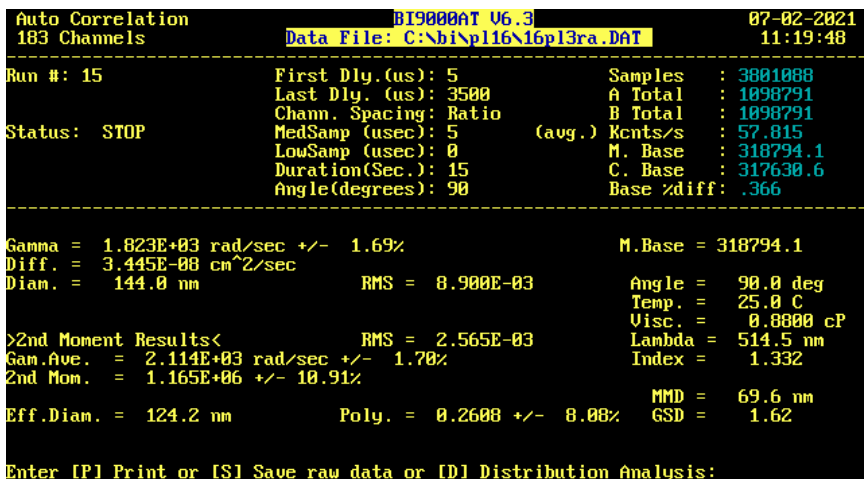

Ag/16pl,  $n_{Ag}/n_{Surf} = 2$

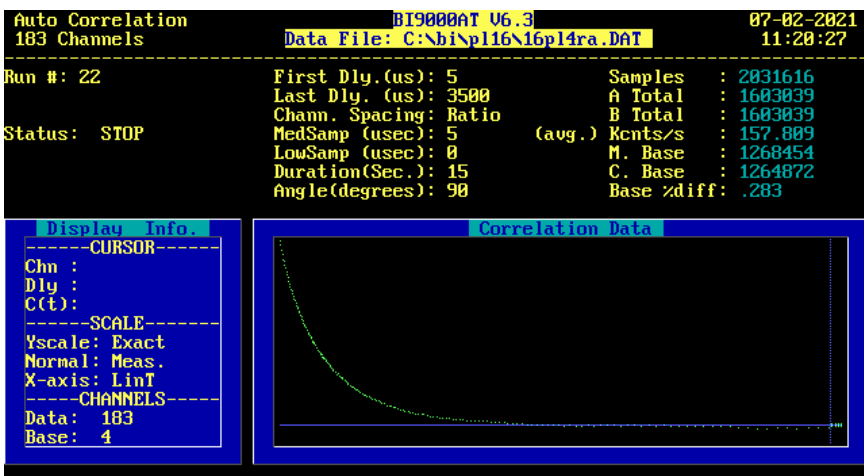

```

Auto Correlation          BI9000AT V6.3          07-02-2021
183 Channels             Data File: C:\bi\pl116\16pl14ra.DAT 11:20:28
-----
Run #: 22                First Dly.(us): 5                Samples : 2031616
                        Last Dly. (us): 3500            A Total : 1603039
                        Chann. Spacing: Ratio            B Total : 1603039
Status:  STOP            MedSamp (usec): 5                (avg.) Kcnts/s : 157.809
                        LowSamp (usec): 0                M. Base : 1268454
                        Duration(Sec.): 15                C. Base : 1264872
                        Angle(degrees): 90                Base %diff: .283
-----

Gamma = 1.677E+03 rad/sec +/- 1.25%          M.Base = 1268454
Diff. = 3.169E-08 cm^2/sec                    Angle = 90.0 deg
Diam. = 156.6 nm                                RMS = 7.006E-03    Temp. = 25.0 C
                                                Visc. = 0.8800 cP
>2nd Moment Results<                        RMS = 1.790E-03    Lambda = 514.5 nm
Gam.Ave. = 1.884E+03 rad/sec +/- 1.17%        Index = 1.332
2nd Mom. = 7.922E+05 +/- 9.45%
Eff.Diam. = 139.4 nm                            Poly. = 0.2232 +/- 7.46%    MMD = 84.2 nm
                                                GSD = 1.57

Enter [P] Print or [S] Save raw data or [D] Distribution Analysis:

```

Ag/17pl,  $n_{\text{Ag}}/n_{\text{surf}} = 8$

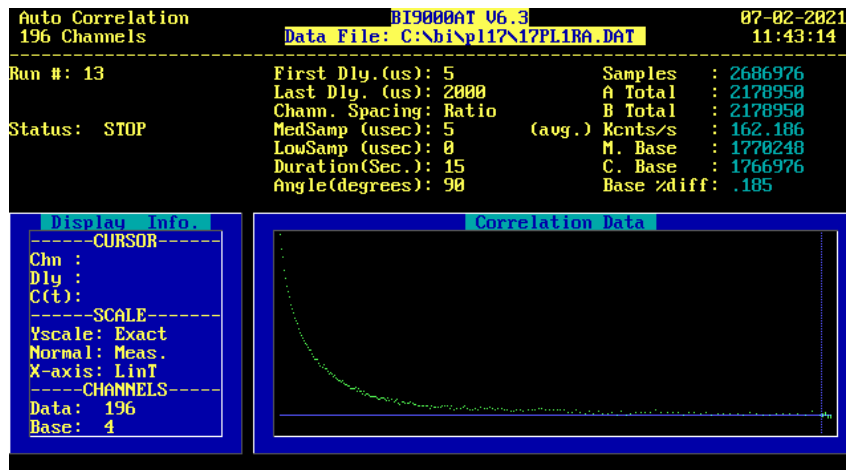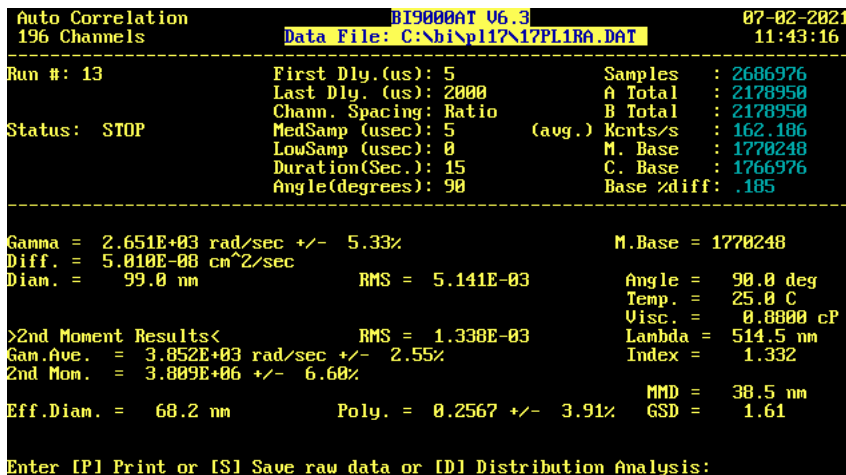

Ag/17pl,  $n_{\text{Ag}}/n_{\text{surf}} = 4$

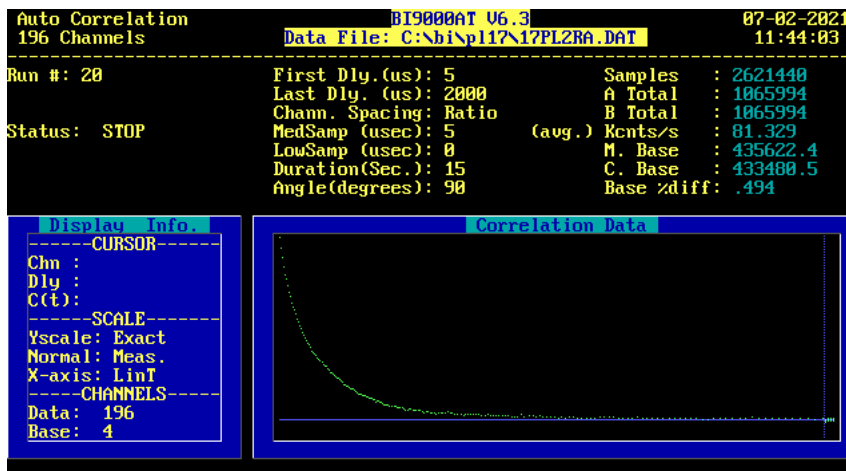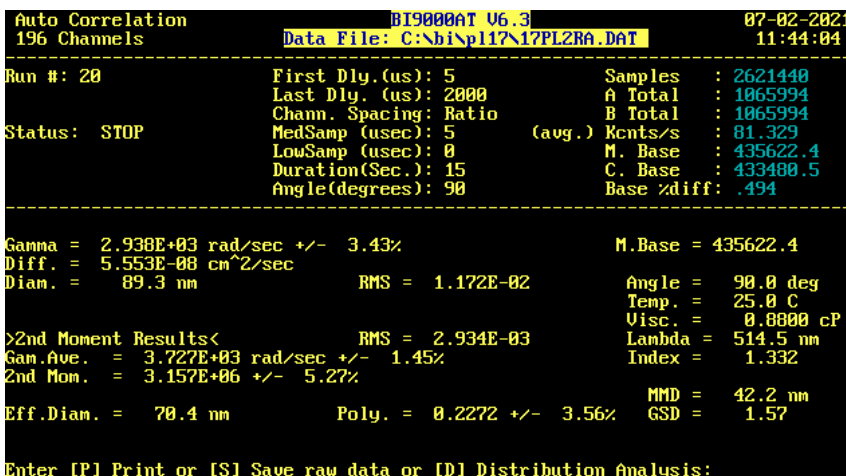

Ag/17pl,  $n_{\text{Ag}}/n_{\text{Surf}} = 2.7$

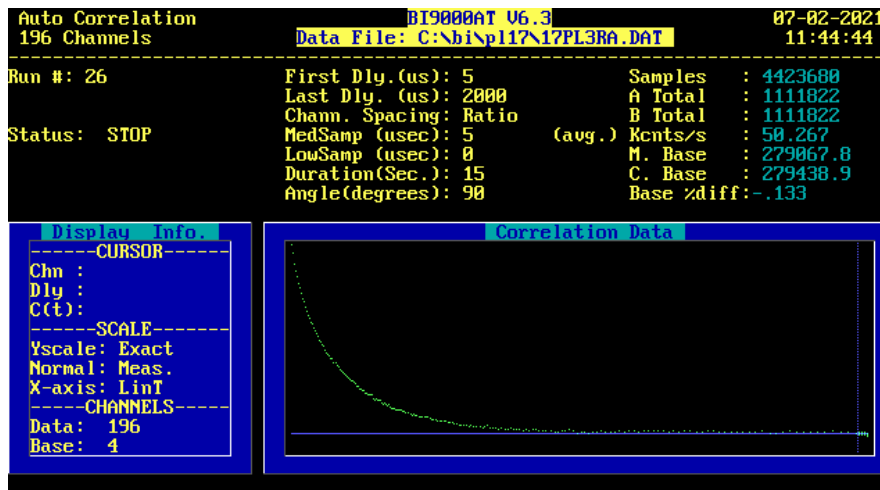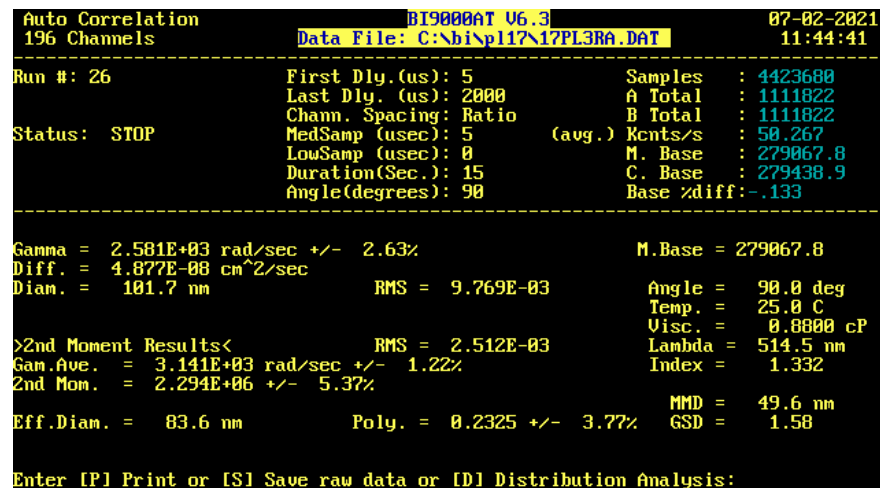

Ag/17pl,  $n_{\text{Ag}}/n_{\text{Surf}} = 2$

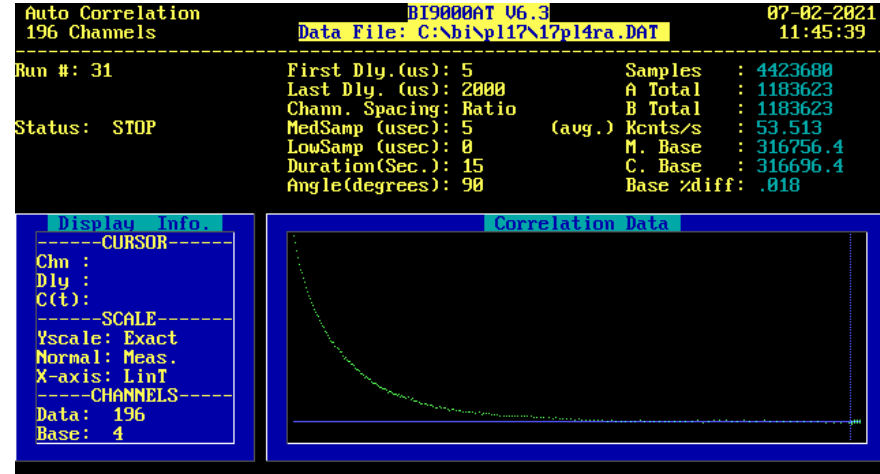

```

Auto Correlation          BI9000AT V6.3          07-02-2021
196 Channels              Data File: C:\bi\pl17\17pl4ra.DAT  11:45:29
-----
Run #: 31                  First Dly.(us): 5          Samples : 4423680
                          Last Dly. (us): 2000          A Total : 1183623
                          Chann. Spacing: Ratio        B Total : 1183623
Status: STOP              MedSamp (usec): 5          (avg.) Kcnts/s : 53.513
                          LowSamp (usec): 0           M. Base : 316756.4
                          Duration(Sec.): 15          C. Base : 316696.4
                          Angle(degrees): 90          Base %diff: .018
-----

Gamma = 2.532E+03 rad/sec +/- 1.70%          M.Base = 316756.4
Diff. = 4.785E-08 cm^2/sec
Diam. = 103.7 nm          RMS = 9.018E-03      Angle = 90.0 deg
                                          Temp. = 25.0 C
                                          Visc. = 0.8800 cP
>2nd Moment Results<          RMS = 2.065E-03      Lambda = 514.5 nm
Gam.Ave. = 3.014E+03 rad/sec +/- 1.31%      Index = 1.332
2nd Mom. = 2.312E+06 +/- 7.31%
                                          MMD = 49.4 nm
Eff.Diam. = 87.1 nm          Poly. = 0.2544 +/- 5.12%      GSD = 1.61

Enter [P] Print or [S] Save raw data or [D] Distribution Analysis:

```

Ag/18pl,  $n_{\text{Ag}}/n_{\text{Surf}} = 8$

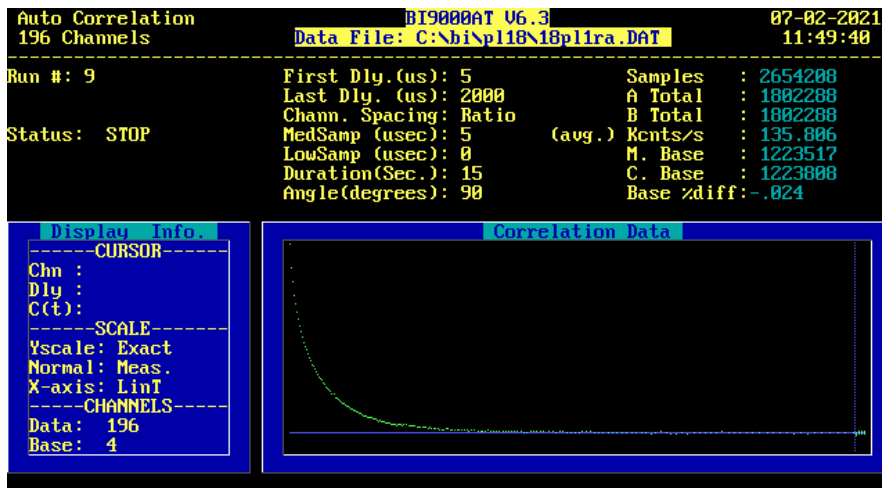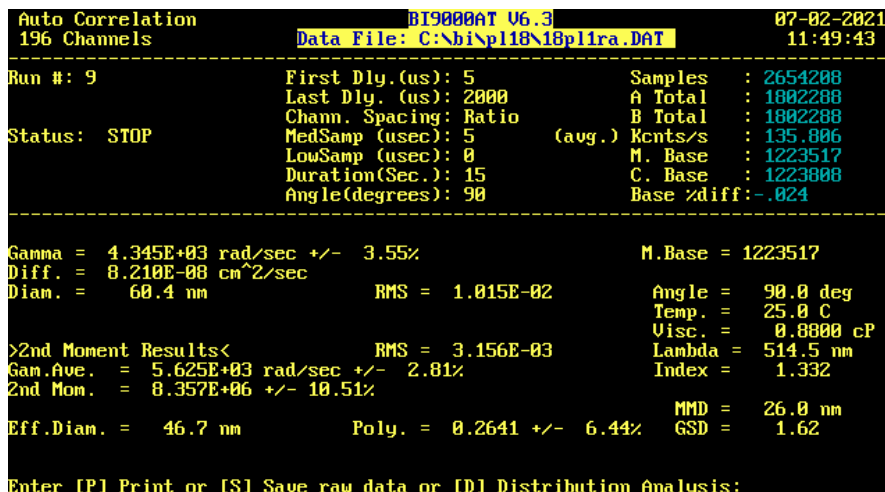

Ag/18pl,  $n_{\text{Ag}}/n_{\text{Surf}} = 4$

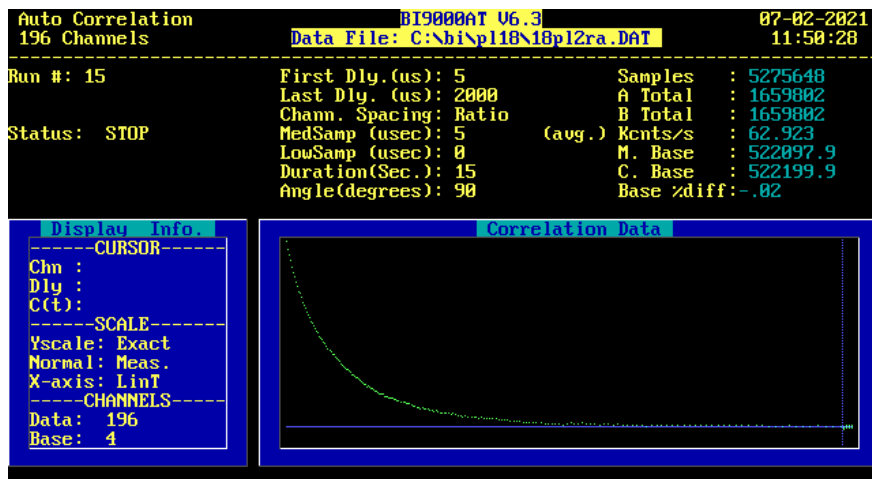

```

Auto Correlation          BI9000AT V6.3          07-02-2021
196 Channels             Data File: C:\bi\pl18\18pl2ra.DAT 11:50:25
-----
Run #: 15                First Dly.(us): 5                Samples : 5275648
                        Last Dly. (us): 2000             A Total : 1659802
                        Chann. Spacing: Ratio             B Total : 1659802
Status: STOP             MedSamp (usec): 5                (avg.) Kcnts/s : 62.923
                        LowSamp (usec): 0                M. Base : 522097.9
                        Duration(Sec.): 15                C. Base : 522199.9
                        Angle(degrees): 90                Base %diff: -.02
-----
Gamma = 2.372E+03 rad/sec +/- 1.88%                M.Base = 522097.9
Diff. = 4.482E-08 cm^2/sec                        Angle = 90.0 deg
Diam. = 110.7 nm                                RMS = 8.610E-03      Temp. = 25.0 C
                                                Visc. = 0.8800 cP
>2nd Moment Results<                                RMS = 1.887E-03      Lambda = 514.5 nm
Gam.Ave. = 2.826E+03 rad/sec +/- 1.04%                Index = 1.332
2nd Mom. = 1.921E+06 +/- 5.42%
Eff.Diam. = 92.9 nm                                Poly. = 0.2405 +/- 3.85%      MMD = 54.2 nm
                                                GSD = 1.59
Enter [P] Print or [S] Save raw data or [D] Distribution Analysis:

```



Ag/18pl,  $n_{Ag}/n_{surf} = 2.7$

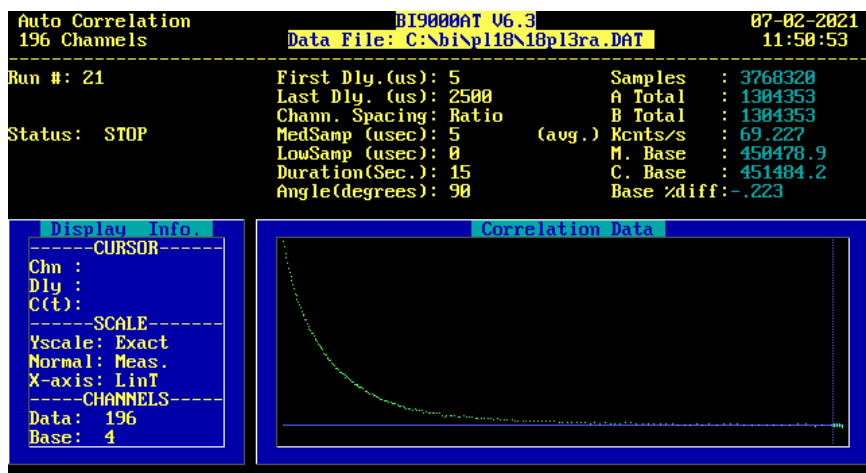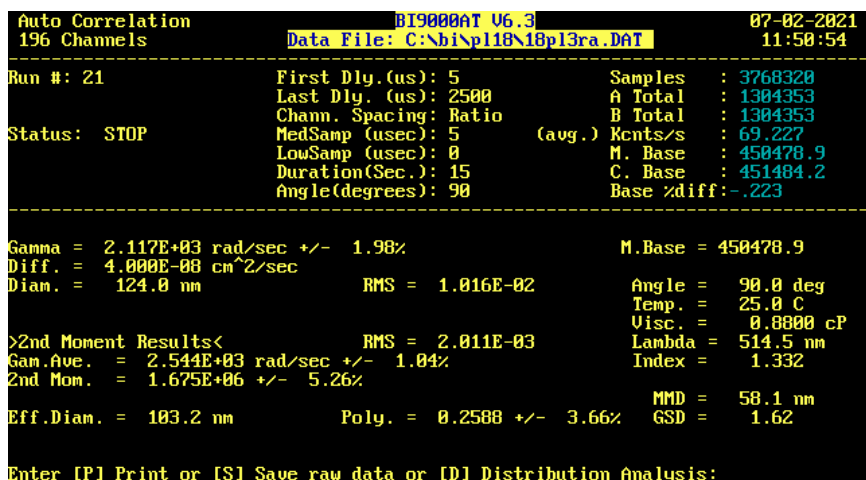

Ag/18pl,  $n_{Ag}/n_{surf} = 2$

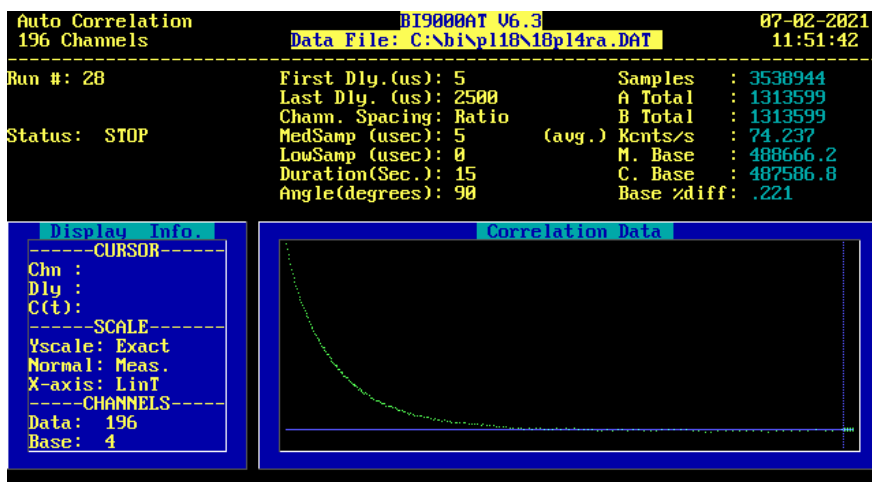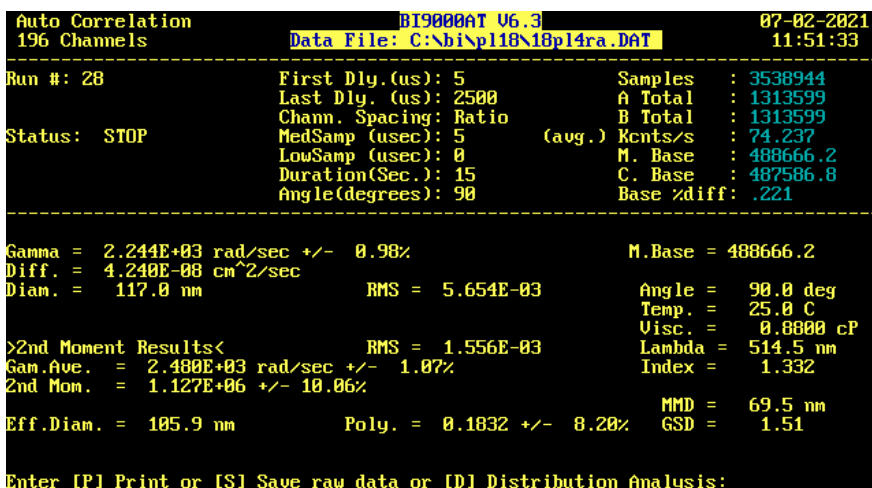

Image of the used DLS experimental setup:

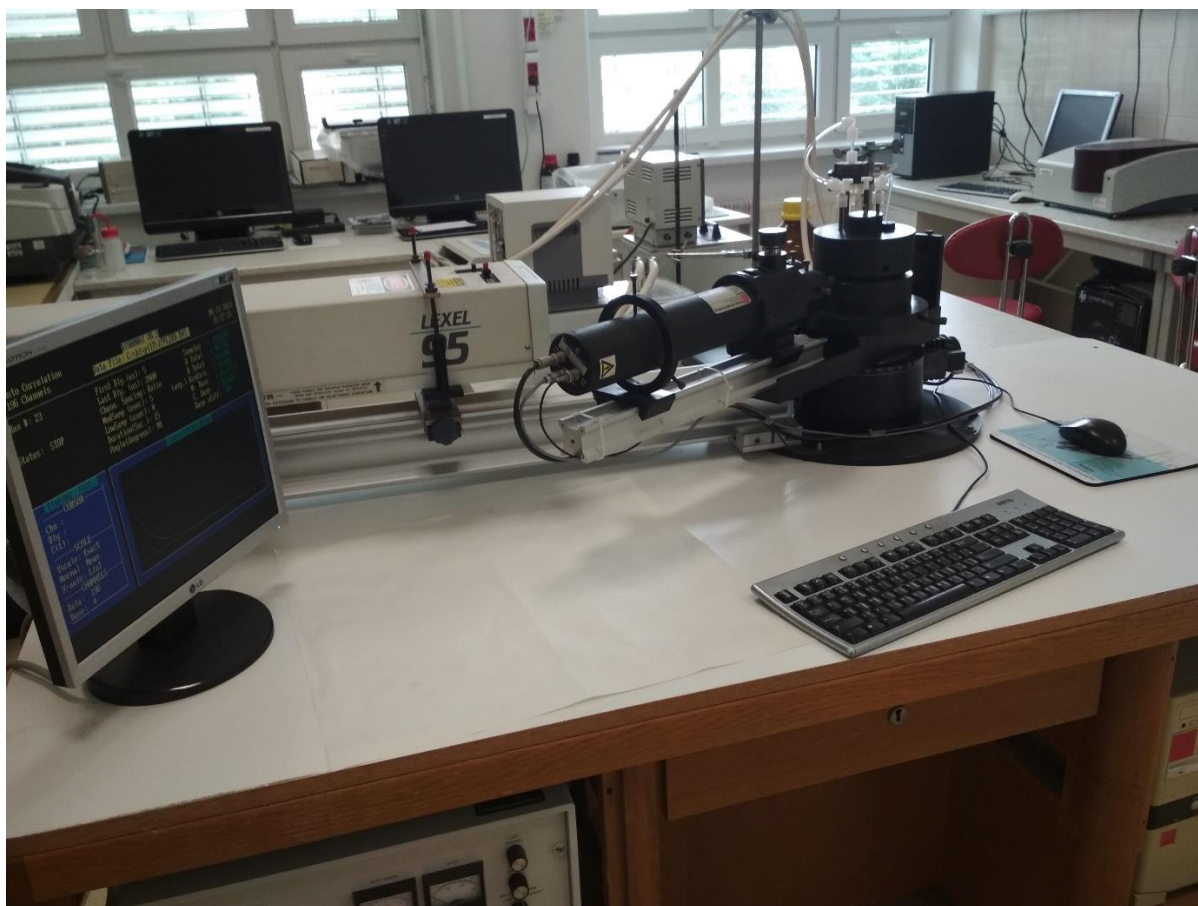

## 2. Zeta potential measurements

Screenshots of zeta potential peaks and the set of 10 repeated measurements are shown for each Ag/surfactant system and each silver-to-surfactant molar ratio value. The screenshots were obtained from the Brookhaven Instruments Zeta Potential Analyzer Software ver. 5.68. To reduce the excessive number of screenshots in the supplementary material, just single set of 10 independent readings of zeta potential for each Ag/surfactant system and each silver-to-surfactant molar ratio value is shown.

### Screenshots section – zeta potential

#### Ag/14pl

Ag/14pl nAg/nSurf = 8 (Run 10)  
Measurement Completed

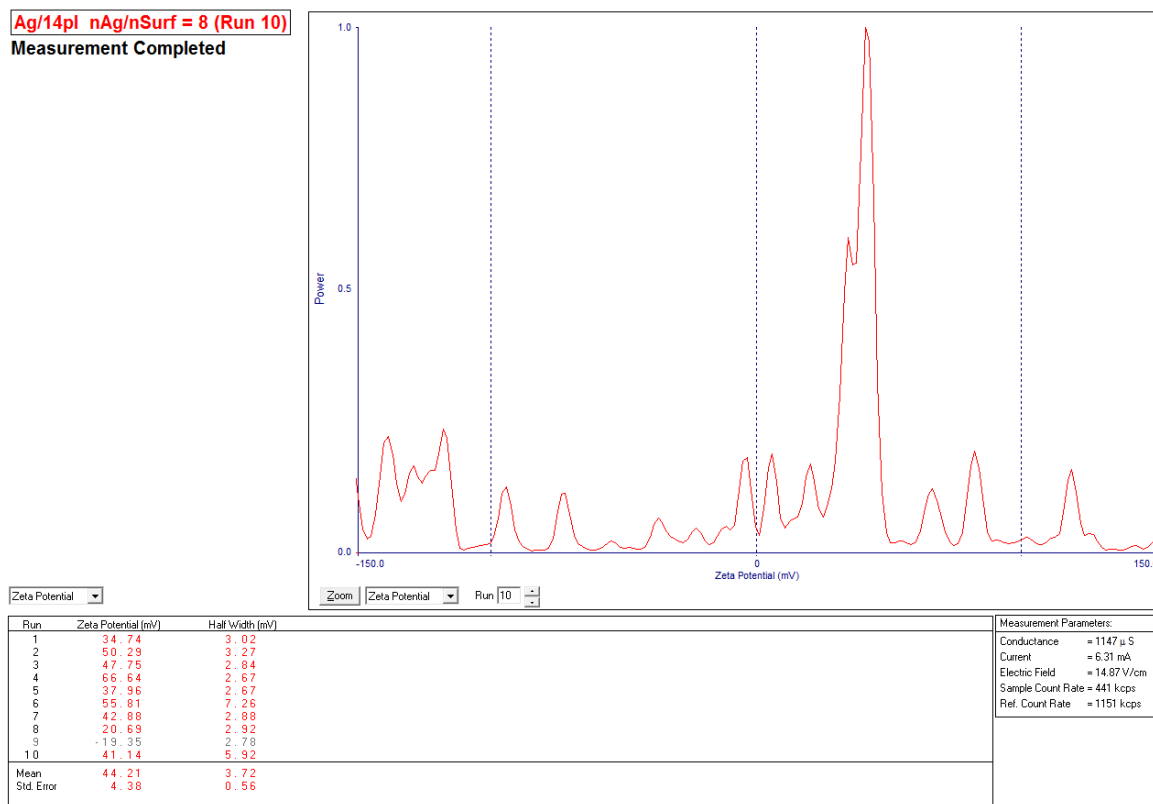

Ag/14pl nAg/nSurf = 4 (Run 10)  
Measurement Completed

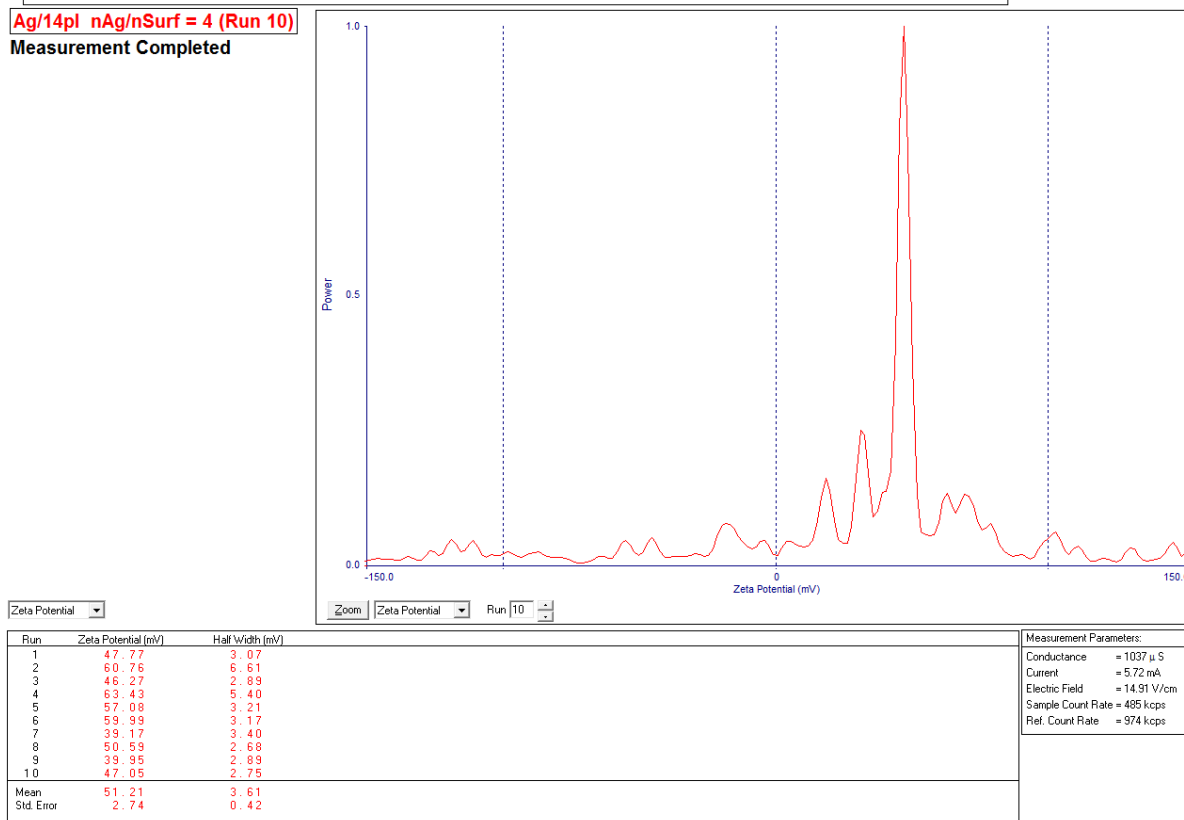

**Ag/14pl nAg/nSurf = 2.7 (Run 10)**  
**Measurement Completed**

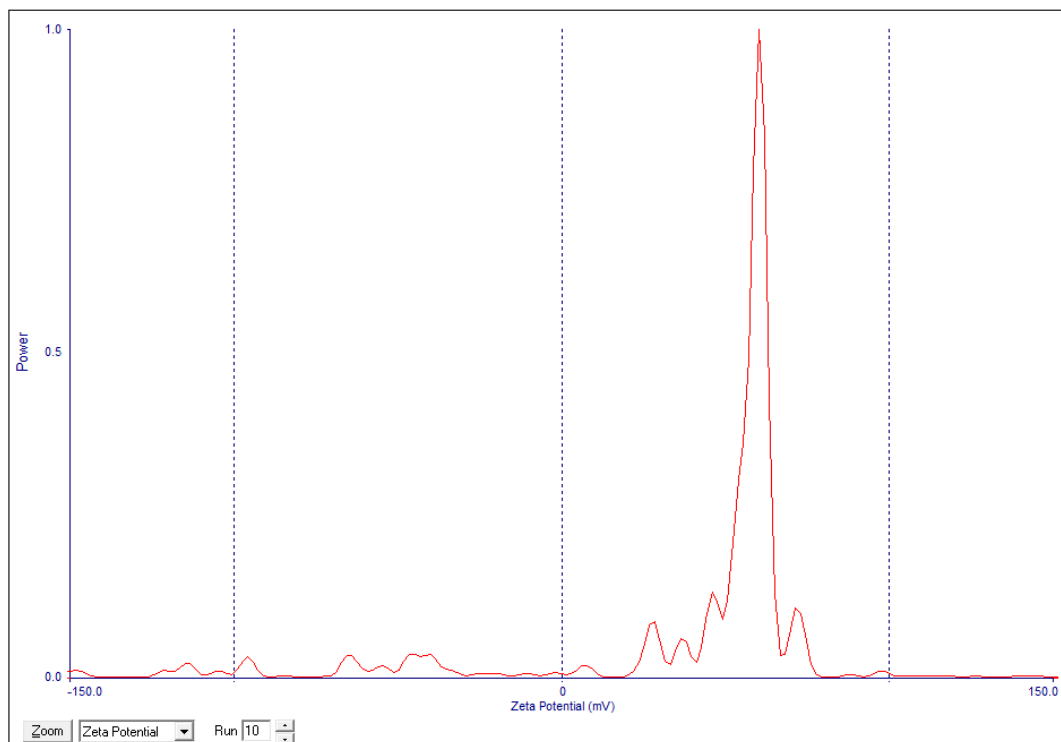

Zeta Potential ▾

| Run        | Zeta Potential (mV) | Half Width (mV) |
|------------|---------------------|-----------------|
| 1          | 57.07               | 3.26            |
| 2          | 54.98               | 3.04            |
| 3          | 50.11               | 3.75            |
| 4          | 52.58               | 2.69            |
| 5          | 54.81               | 3.97            |
| 6          | 56.83               | 2.76            |
| 7          | 47.26               | 2.67            |
| 8          | 56.92               | 3.80            |
| 9          | 51.60               | 2.75            |
| 10         | 60.26               | 3.02            |
| Mean       | 54.24               | 3.17            |
| Std. Error | 1.22                | 0.16            |

Measurement Parameters:

Conductance = 831  $\mu$ S  
 Current = 4.60 mA  
 Electric Field = 15.08 V/cm  
 Sample Count Rate = 391 kcps  
 Ref. Count Rate = 916 kcps

**Ag/14pl nAg/nSurf = 2 (Run 10)**  
**Measurement Completed**

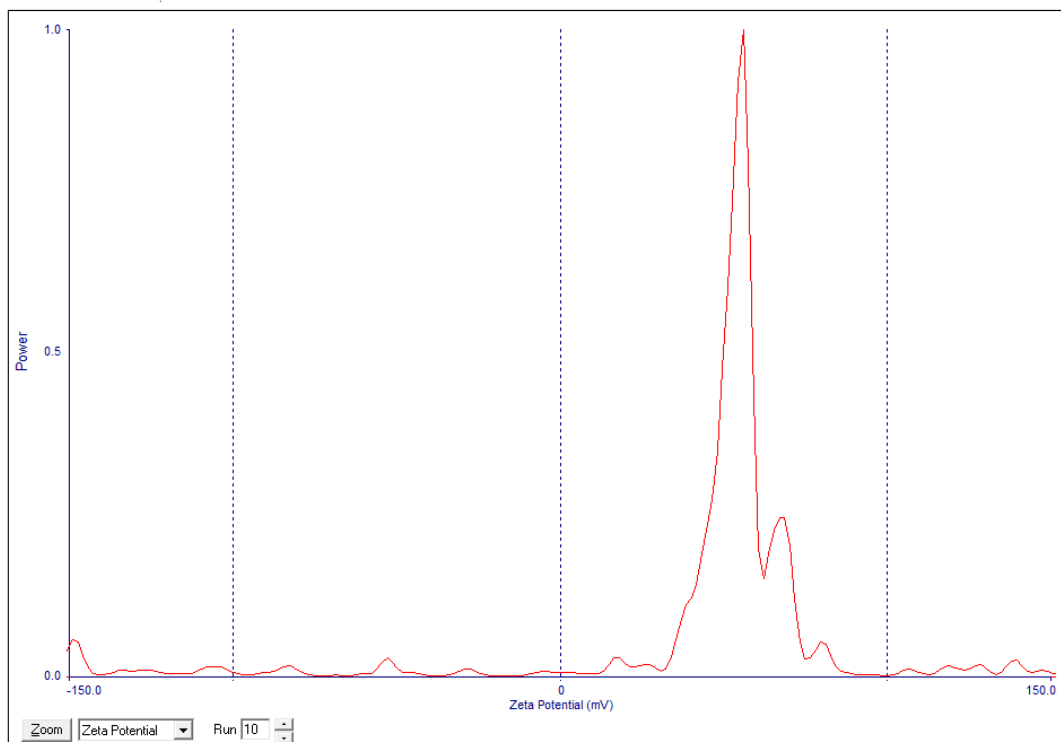

Zeta Potential ▾

| Run        | Zeta Potential (mV) | Half Width (mV) |
|------------|---------------------|-----------------|
| 1          | 64.62               | 2.84            |
| 2          | 52.84               | 4.50            |
| 3          | 61.96               | 4.96            |
| 4          | 52.86               | 3.34            |
| 5          | 50.74               | 2.70            |
| 6          | 51.32               | 3.17            |
| 7          | 51.32               | 3.27            |
| 8          | 41.83               | 2.70            |
| 9          | 51.69               | 3.24            |
| 10         | 55.96               | 4.43            |
| Mean       | 53.52               | 3.52            |
| Std. Error | 2.00                | 0.26            |

Measurement Parameters:

Conductance = 753  $\mu$ S  
 Current = 4.18 mA  
 Electric Field = 15.27 V/cm  
 Sample Count Rate = 319 kcps  
 Ref. Count Rate = 897 kcps

Ag/15pl

Ag/15pl nAg/nSurf = 8 (Run 10)  
Measurement Completed

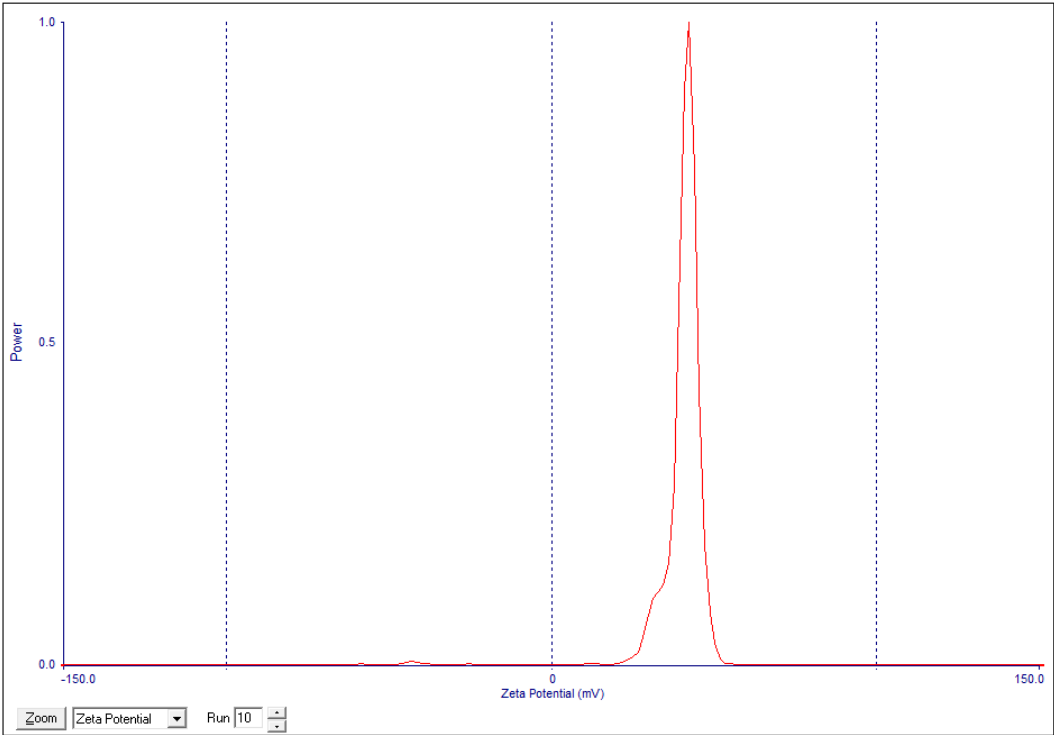

| Run        | Zeta Potential (mV) | Half Width (mV) |
|------------|---------------------|-----------------|
| 1          | 36.29               | 2.76            |
| 2          | 18.20               | 2.68            |
| 3          | 37.19               | 2.78            |
| 4          | 36.16               | 2.80            |
| 5          | 37.16               | 2.82            |
| 6          | 33.05               | 3.03            |
| 7          | 34.63               | 3.87            |
| 8          | 31.57               | 2.97            |
| 9          | 30.95               | 2.95            |
| 10         | 42.39               | 3.16            |
| Mean       | 33.76               | 2.98            |
| Std. Error | 2.02                | 0.11            |

|                         |               |
|-------------------------|---------------|
| Measurement Parameters: |               |
| Conductance             | = 917 $\mu$ S |
| Current                 | = 5.06 mA     |
| Electric Field          | = 15.01 V/cm  |
| Sample Count Rate       | = 375 kcps    |
| Ref. Count Rate         | = 1049 kcps   |

Ag/15pl nAg/nSurf = 4 (Run 10)  
Measurement Completed

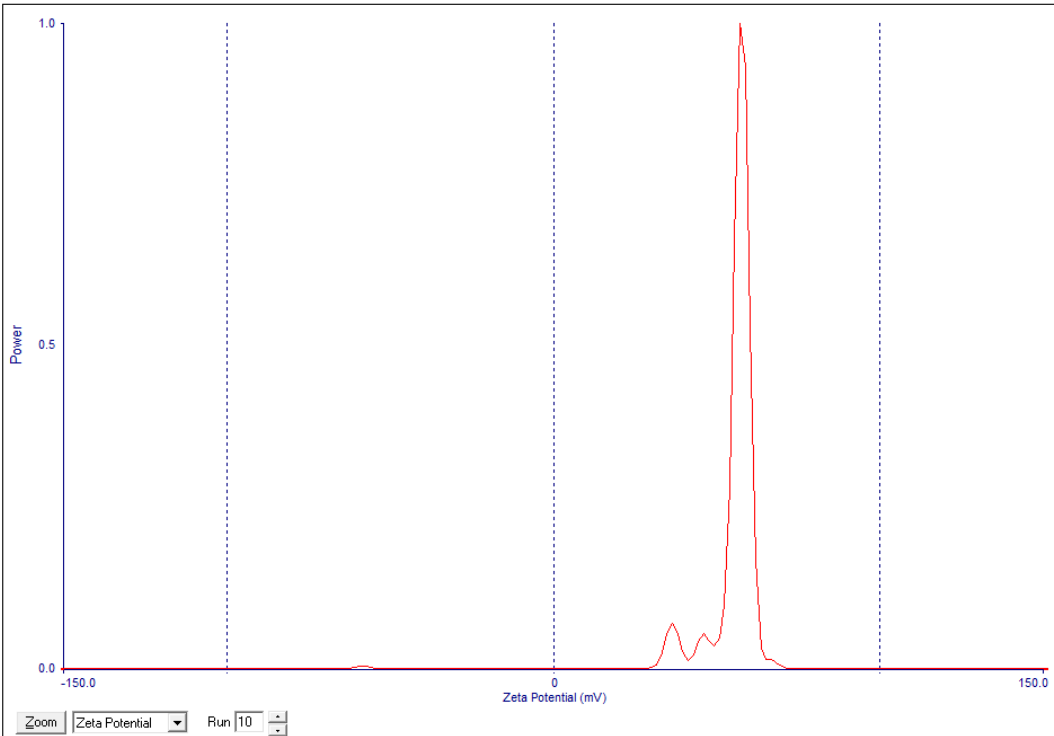

| Run        | Zeta Potential (mV) | Half Width (mV) |
|------------|---------------------|-----------------|
| 1          | 32.79               | 2.85            |
| 2          | 37.51               | 2.92            |
| 3          | 39.86               | 3.04            |
| 4          | 40.01               | 2.97            |
| 5          | 44.28               | 7.38            |
| 6          | 47.47               | 3.55            |
| 7          | 46.03               | 3.22            |
| 8          | 39.76               | 4.19            |
| 9          | 43.02               | 2.87            |
| 10         | 57.15               | 2.79            |
| Mean       | 42.79               | 3.58            |
| Std. Error | 2.09                | 0.44            |

|                         |                |
|-------------------------|----------------|
| Measurement Parameters: |                |
| Conductance             | = 1075 $\mu$ S |
| Current                 | = 5.92 mA      |
| Electric Field          | = 14.86 V/cm   |
| Sample Count Rate       | = 312 kcps     |
| Ref. Count Rate         | = 896 kcps     |

**Ag/15pl nAg/nSurf = 2.7 (Run 10)**  
**Measurement Completed**

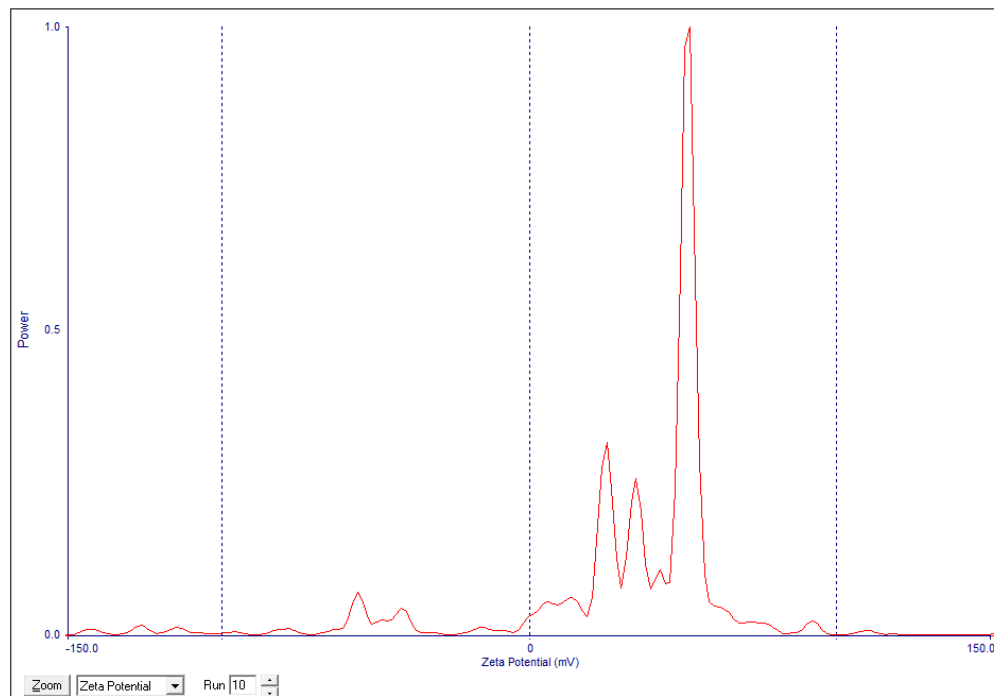

| Run        | Zeta Potential (mV) | Half Width (mV) |
|------------|---------------------|-----------------|
| 1          | 41.15               | 3.27            |
| 2          | 53.80               | 5.08            |
| 3          | 49.93               | 3.19            |
| 4          | 52.17               | 3.05            |
| 5          | 64.98               | 3.37            |
| 6          | 59.98               | 2.76            |
| 7          | 55.28               | 3.44            |
| 8          | 56.98               | 3.76            |
| 9          | 53.22               | 3.19            |
| 10         | 52.26               | 2.94            |
| Mean       | 53.97               | 3.40            |
| Std. Error | 1.98                | 0.21            |

|                         |                |
|-------------------------|----------------|
| Measurement Parameters: |                |
| Conductance             | = 1015 $\mu$ S |
| Current                 | = 5.60 mA      |
| Electric Field          | = 14.93 V/cm   |
| Sample Count Rate       | = 408 kcps     |
| Ref. Count Rate         | = 950 kcps     |

**Ag/15pl nAg/nSurf = 2 (Run 10)**  
**Measurement Completed**

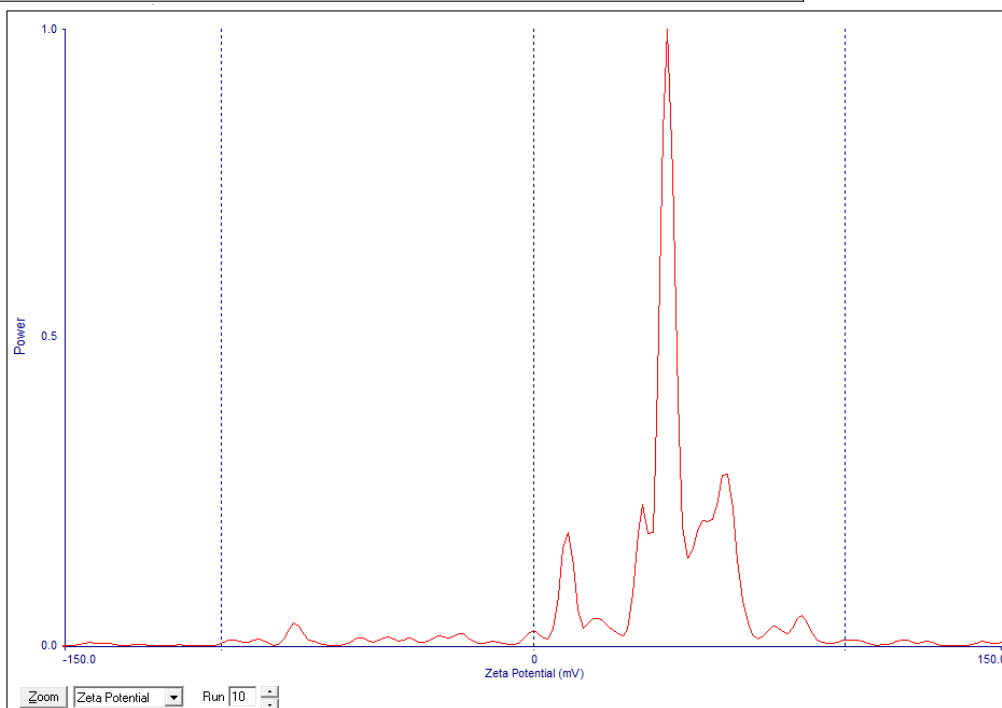

| Run        | Zeta Potential (mV) | Half Width (mV) |
|------------|---------------------|-----------------|
| 1          | 51.75               | 3.85            |
| 2          | 64.53               | 3.70            |
| 3          | 65.92               | 3.34            |
| 4          | 62.23               | 3.38            |
| 5          | 55.34               | 2.67            |
| 6          | 66.79               | 2.80            |
| 7          | 57.07               | 2.80            |
| 8          | 55.42               | 3.10            |
| 9          | 58.34               | 3.68            |
| 10         | 43.15               | 2.84            |
| Mean       | 58.04               | 3.22            |
| Std. Error | 2.29                | 0.14            |

|                         |               |
|-------------------------|---------------|
| Measurement Parameters: |               |
| Conductance             | = 632 $\mu$ S |
| Current                 | = 3.53 mA     |
| Electric Field          | = 15.08 V/cm  |
| Sample Count Rate       | = 440 kcps    |
| Ref. Count Rate         | = 937 kcps    |

Ag/16pl nAg/nSurf = 8 (Run 10)  
Measurement Completed

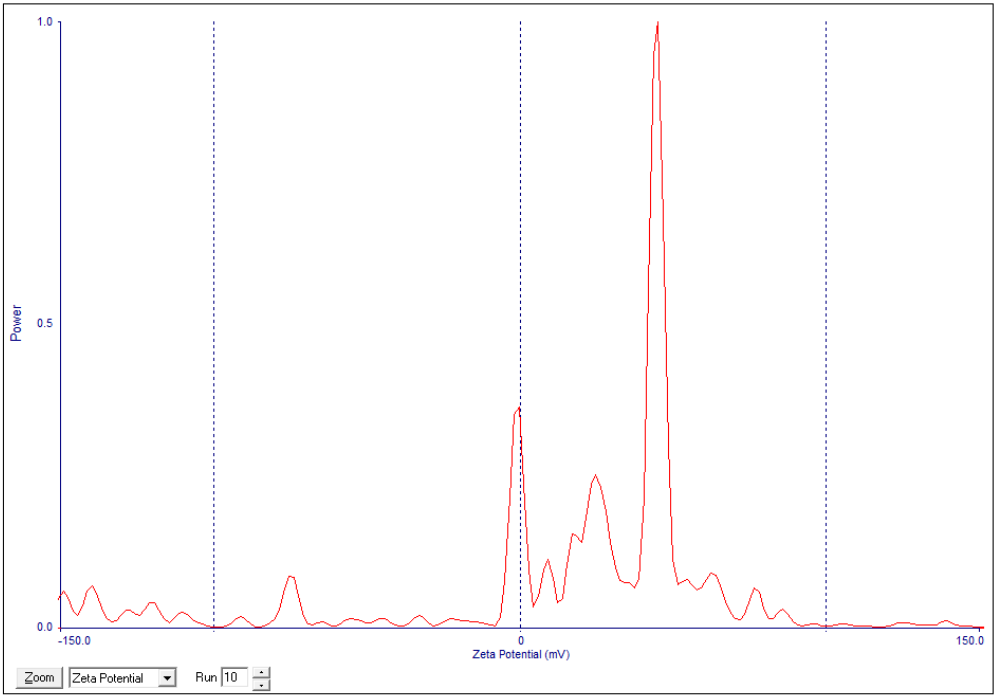

| Run        | Zeta Potential (mV) | Half Width (mV) |
|------------|---------------------|-----------------|
| 1          | 32.92               | 3.88            |
| 2          | 23.63               | 3.08            |
| 3          | 48.33               | 2.77            |
| 4          | 31.23               | 3.06            |
| 5          | 53.43               | 3.17            |
| 6          | 45.86               | 3.80            |
| 7          | 46.99               | 2.83            |
| 8          | 43.97               | 3.72            |
| 9          | 35.98               | 6.16            |
| 10         | 45.21               | 2.85            |
| Mean       | 40.76               | 3.53            |
| Std. Error | 2.95                | 0.32            |

|                              |
|------------------------------|
| Measurement Parameters:      |
| Conductance = 1206 $\mu$ S   |
| Current = 6.63 mA            |
| Electric Field = 14.92 V/cm  |
| Sample Count Rate = 422 kcps |
| Ref. Count Rate = 1140 kcps  |

Ag/16pl nAg/nSurf = 4 (Run 10)  
Measurement Completed

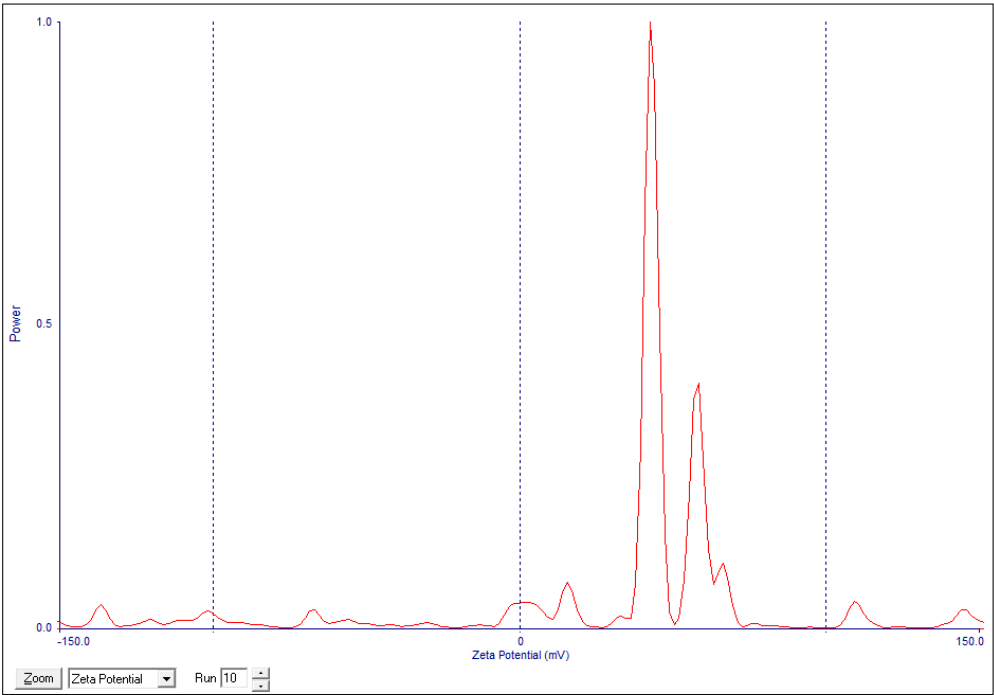

| Run        | Zeta Potential (mV) | Half Width (mV) |
|------------|---------------------|-----------------|
| 1          | 46.81               | 2.83            |
| 2          | 36.33               | 2.88            |
| 3          | 51.98               | 3.20            |
| 4          | 45.97               | 3.00            |
| 5          | 68.15               | 2.90            |
| 6          | 63.42               | 2.65            |
| 7          | 63.13               | 2.93            |
| 8          | 45.95               | 2.92            |
| 9          | 61.36               | 3.29            |
| 10         | 42.59               | 2.75            |
| Mean       | 52.57               | 2.94            |
| Std. Error | 3.39                | 0.06            |

|                              |
|------------------------------|
| Measurement Parameters:      |
| Conductance = 1360 $\mu$ S   |
| Current = 7.46 mA            |
| Electric Field = 14.86 V/cm  |
| Sample Count Rate = 395 kcps |
| Ref. Count Rate = 972 kcps   |

**Ag/16pl nAg/nSurf = 2.7 (Run 10)**  
**Measurement Completed**

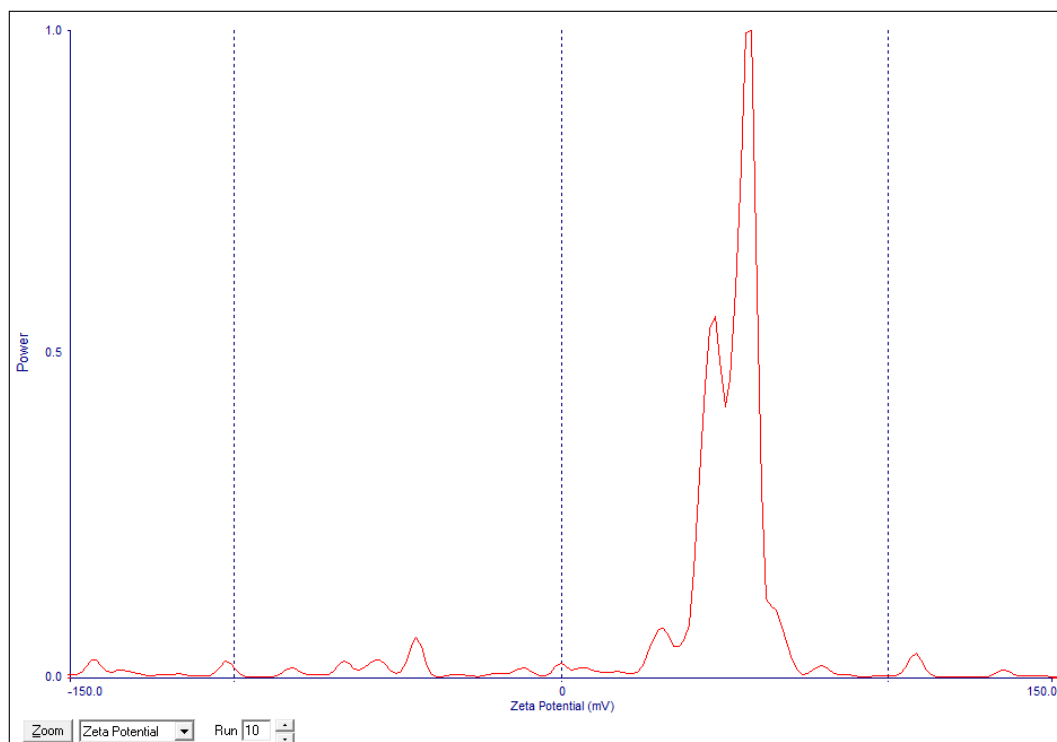

Zeta Potential ▾

| Run        | Zeta Potential (mV) | Half Width (mV) |
|------------|---------------------|-----------------|
| 1          | 55.28               | 2.95            |
| 2          | 59.73               | 3.06            |
| 3          | 35.57               | 2.77            |
| 4          | -44.54              | 3.20            |
| 5          | -122.16             | 3.38            |
| 6          | 50.10               | 3.01            |
| 7          | 48.08               | 3.74            |
| 8          | 61.42               | 4.77            |
| 9          | 47.14               | 3.21            |
| 10         | 58.04               | 4.08            |
| Mean       | 54.26               | 3.55            |
| Std. Error | 2.20                | 0.26            |

Measurement Parameters:

Conductance = 990  $\mu$  S  
 Current = 5.46 mA  
 Electric Field = 15.02 V/cm  
 Sample Count Rate = 360 kcps  
 Ref. Count Rate = 909 kcps

**Ag/16pl nAg/nSurf = 2 (Run 10)**  
**Measurement Completed**

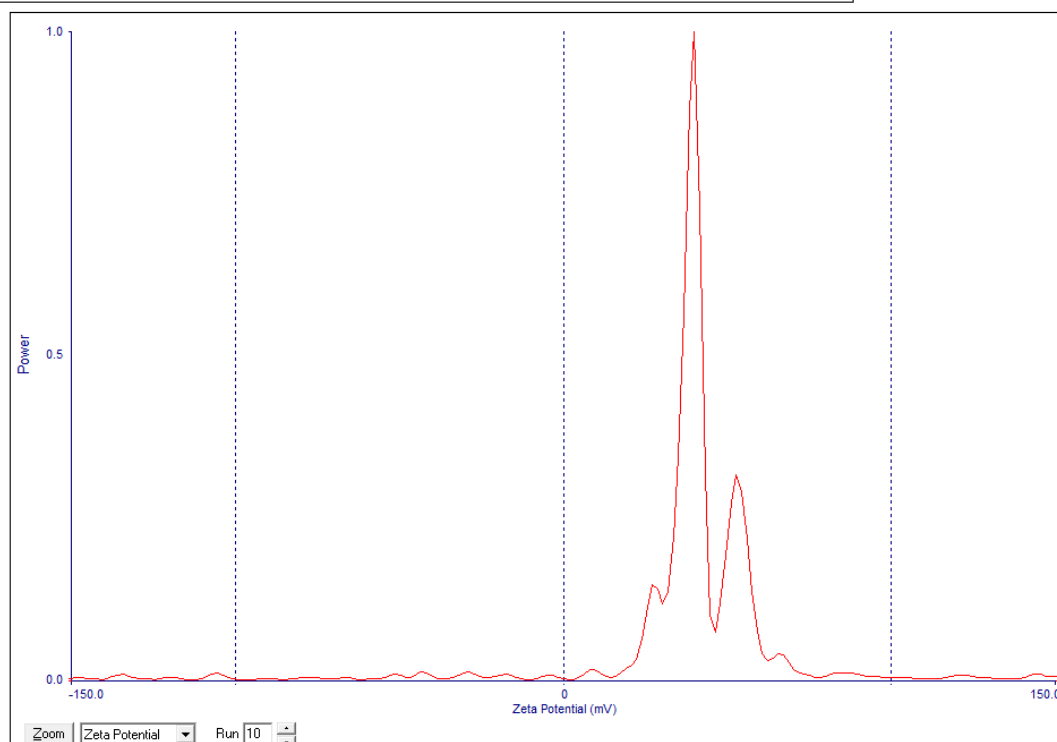

Zeta Potential ▾

| Run        | Zeta Potential (mV) | Half Width (mV) |
|------------|---------------------|-----------------|
| 1          | 47.22               | 2.78            |
| 2          | 48.71               | 5.48            |
| 3          | 55.26               | 4.60            |
| 4          | 46.64               | 2.98            |
| 5          | 42.53               | 2.87            |
| 6          | 51.99               | 3.36            |
| 7          | 48.78               | 5.37            |
| 8          | 43.14               | 3.40            |
| 9          | 42.25               | 4.91            |
| 10         | 39.96               | 3.08            |
| Mean       | 46.65               | 3.88            |
| Std. Error | 1.51                | 0.34            |

Measurement Parameters:

Conductance = 672  $\mu$  S  
 Current = 3.74 mA  
 Electric Field = 15.00 V/cm  
 Sample Count Rate = 351 kcps  
 Ref. Count Rate = 947 kcps



Ag/17pl nAg/nSurf = 8 (Run 10)  
Measurement Completed

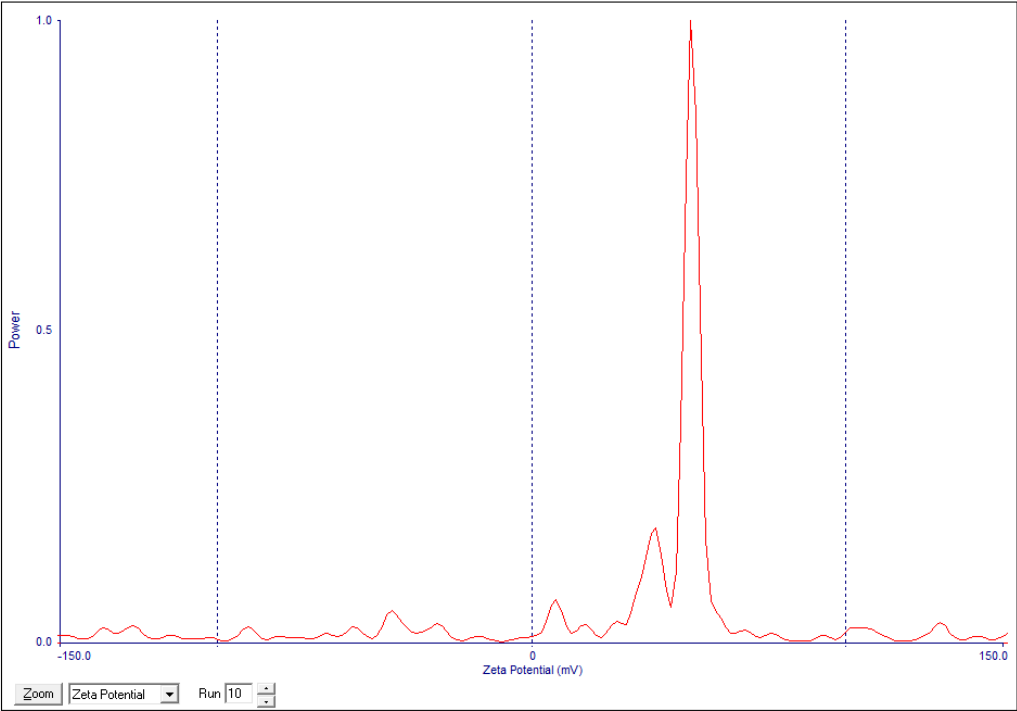

| Run        | Zeta Potential (mV) | Half Width (mV) |
|------------|---------------------|-----------------|
| 1          | 40.40               | 4.33            |
| 2          | 58.64               | 2.85            |
| 3          | 45.87               | 3.32            |
| 4          | 54.58               | 3.11            |
| 5          | 40.91               | 2.72            |
| 6          | 59.43               | 2.78            |
| 7          | 44.24               | 2.71            |
| 8          | 52.03               | 4.10            |
| 9          | 46.76               | 3.99            |
| 10         | 50.74               | 2.78            |
| Mean       | 49.36               | 3.27            |
| Std. Error | 2.16                | 0.20            |

| Measurement Parameters: |               |
|-------------------------|---------------|
| Conductance             | = 920 $\mu$ S |
| Current                 | = 5.08 mA     |
| Electric Field          | = 14.93 V/cm  |
| Sample Count Rate       | = 251 kcps    |
| Ref. Count Rate         | = 1266 kcps   |

Ag/17pl nAg/nSurf = 4 (Run 10)  
Measurement Completed

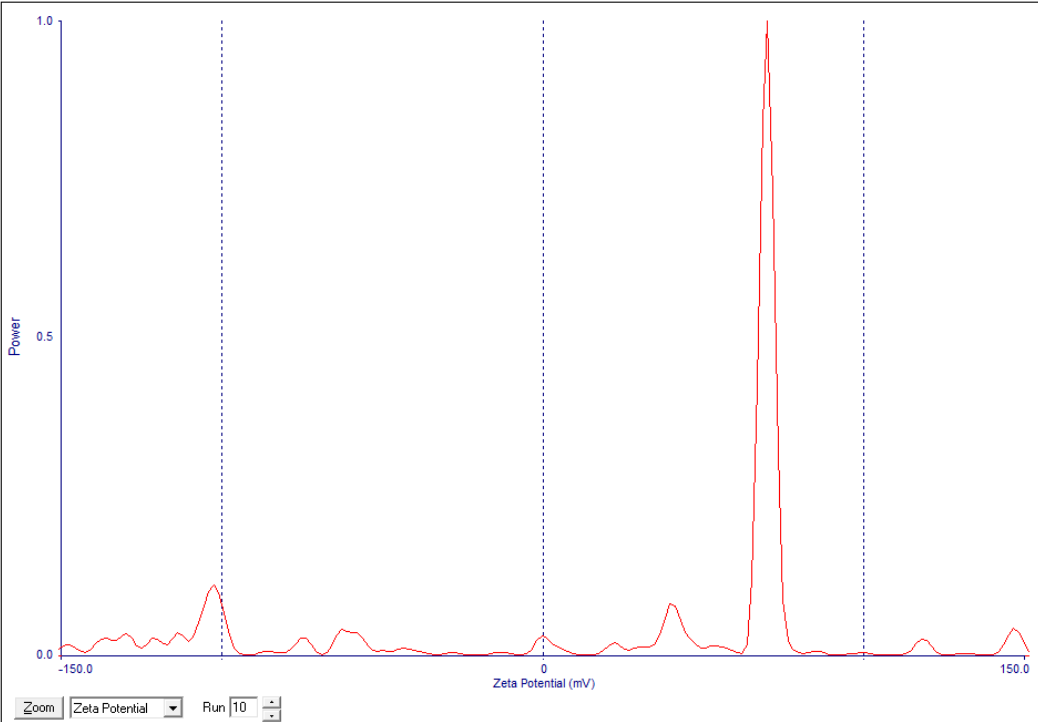

| Run        | Zeta Potential (mV) | Half Width (mV) |
|------------|---------------------|-----------------|
| 1          | 65.20               | 2.71            |
| 2          | 45.93               | 3.00            |
| 3          | 53.73               | 3.20            |
| 4          | 58.87               | 3.11            |
| 5          | 57.04               | 5.43            |
| 6          | -165.80             | 1.88            |
| 7          | 56.63               | 4.39            |
| 8          | 49.13               | 2.63            |
| 9          | -124.47             | 2.82            |
| 10         | 70.03               | 2.70            |
| Mean       | 57.07               | 3.40            |
| Std. Error | 2.79                | 0.35            |

| Measurement Parameters: |               |
|-------------------------|---------------|
| Conductance             | = 998 $\mu$ S |
| Current                 | = 5.50 mA     |
| Electric Field          | = 14.92 V/cm  |
| Sample Count Rate       | = 492 kcps    |
| Ref. Count Rate         | = 1086 kcps   |

Ag/17pl nAg/nSurf = 2.7 (Run 10)  
Measurement Completed

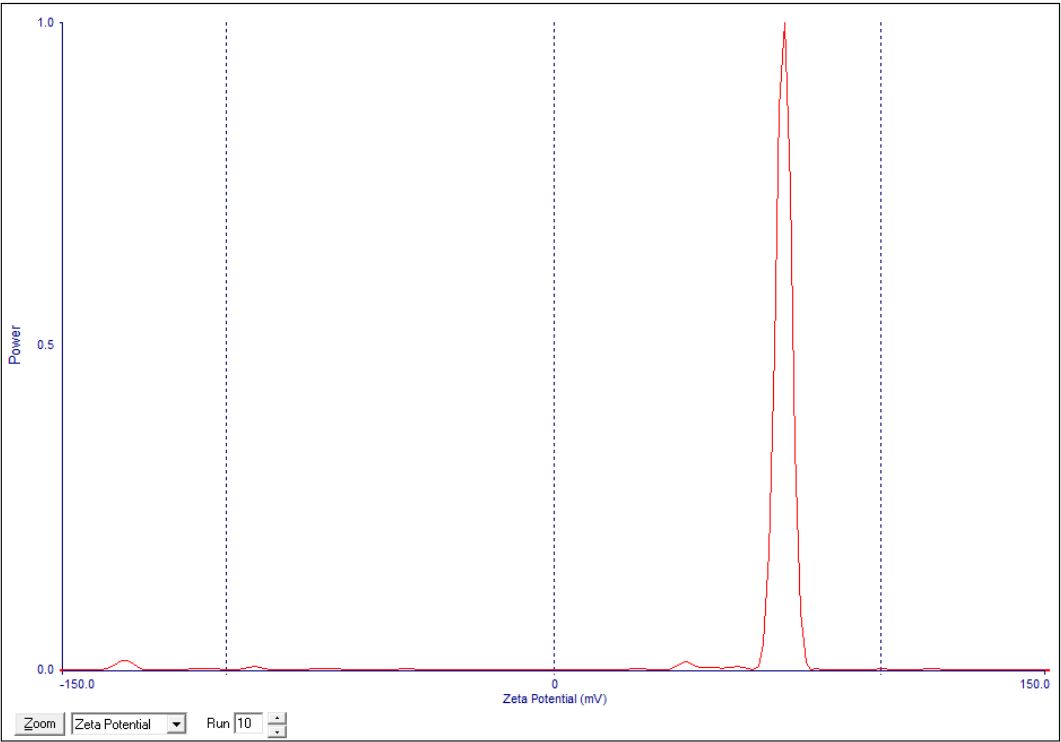

| Run        | Zeta Potential (mV) | Half Width (mV) |
|------------|---------------------|-----------------|
| 1          | 43.05               | 2.86            |
| 2          | 50.82               | 6.15            |
| 3          | 50.31               | 2.97            |
| 4          | 46.63               | 2.80            |
| 5          | 54.49               | 3.14            |
| 6          | 60.56               | 3.05            |
| 7          | 61.21               | 2.60            |
| 8          | 62.74               | 2.96            |
| 9          | 55.73               | 3.18            |
| 10         | 70.59               | 2.88            |
| Mean       | 55.61               | 3.26            |
| Std. Error | 2.63                | 0.33            |

|                         |               |
|-------------------------|---------------|
| Measurement Parameters: |               |
| Conductance             | = 804 $\mu$ S |
| Current                 | = 4.46 mA     |
| Electric Field          | = 14.84 V/cm  |
| Sample Count Rate       | = 399 kcps    |
| Ref. Count Rate         | = 900 kcps    |

Ag/17pl nAg/nSurf = 2 (Run 10)  
Measurement Completed

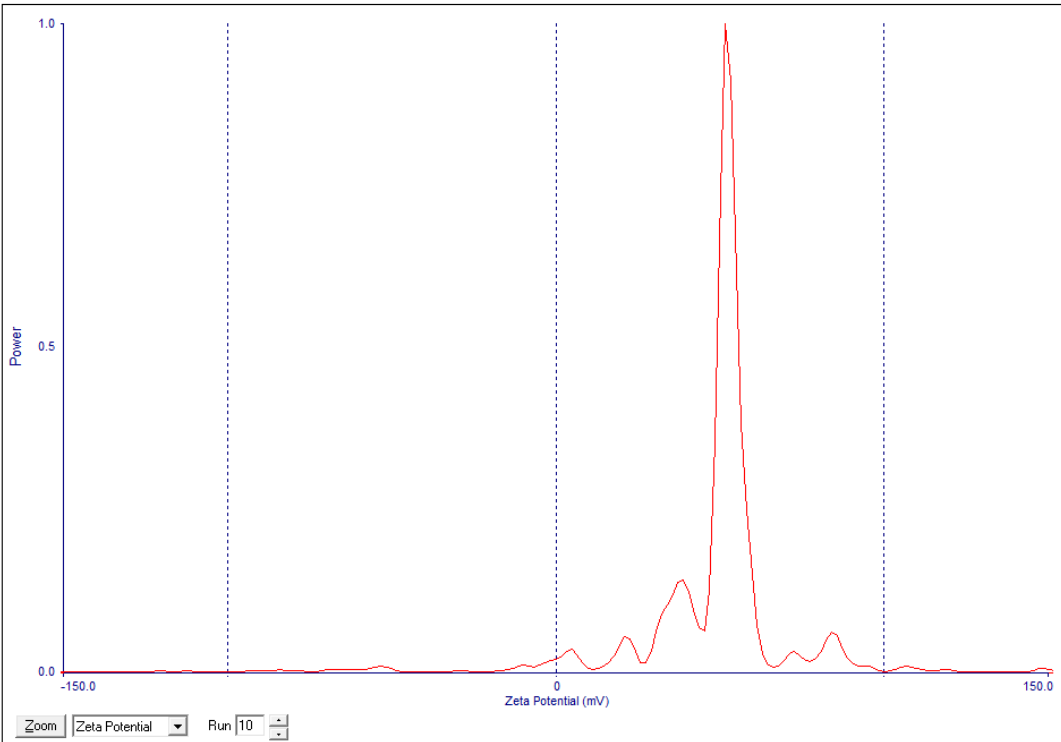

| Run        | Zeta Potential (mV) | Half Width (mV) |
|------------|---------------------|-----------------|
| 1          | 57.28               | 7.36            |
| 2          | 81.68               | 2.61            |
| 3          | 47.92               | 3.47            |
| 4          | 51.66               | 4.38            |
| 5          | 50.67               | 2.99            |
| 6          | 62.78               | 3.04            |
| 7          | 55.83               | 4.07            |
| 8          | 61.10               | 5.93            |
| 9          | 55.85               | 2.90            |
| 10         | 51.74               | 3.33            |
| Mean       | 57.65               | 4.01            |
| Std. Error | 3.05                | 0.48            |

|                         |               |
|-------------------------|---------------|
| Measurement Parameters: |               |
| Conductance             | = 730 $\mu$ S |
| Current                 | = 4.06 mA     |
| Electric Field          | = 14.86 V/cm  |
| Sample Count Rate       | = 318 kcps    |
| Ref. Count Rate         | = 886 kcps    |

Ag/18pl

Ag/18pl nAg/nSurf = 8 (Run 10)  
Measurement Completed

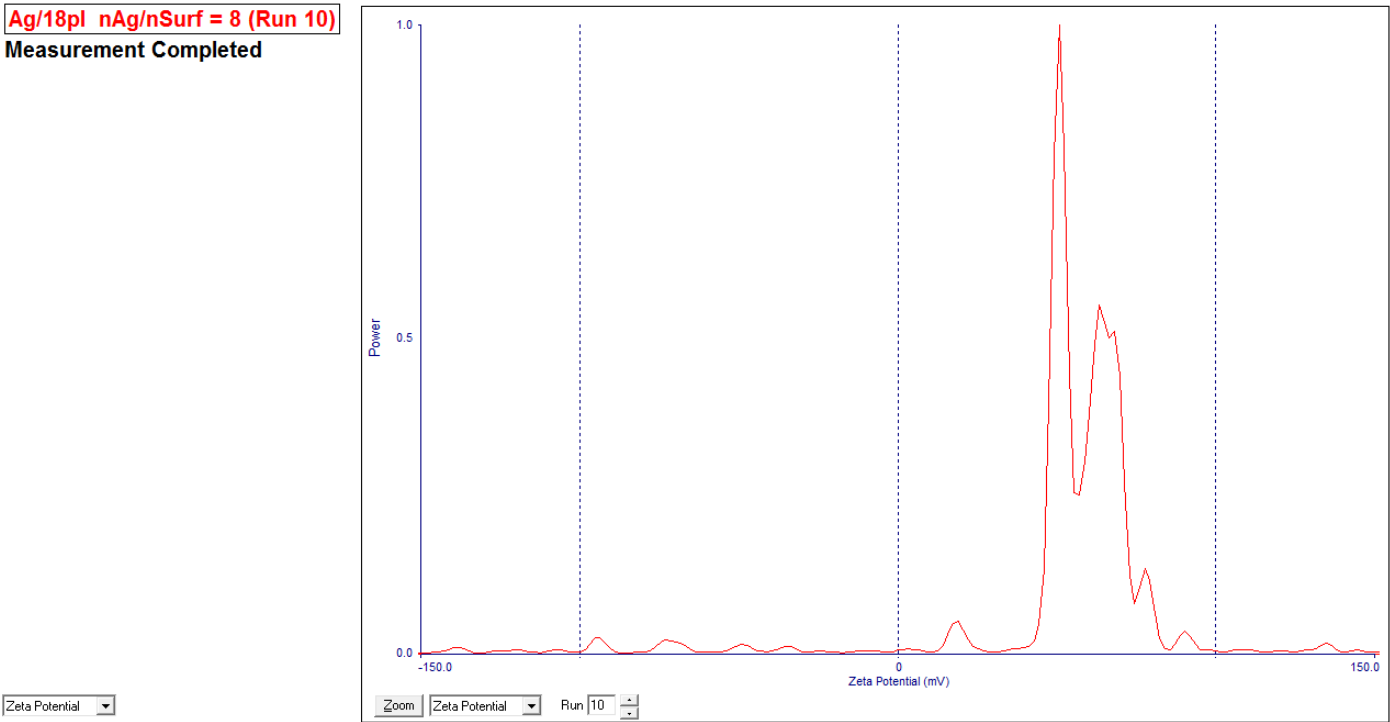

| Run        | Zeta Potential (mV) | Half Width (mV) |
|------------|---------------------|-----------------|
| 1          | 61.40               | 3.14            |
| 2          | 66.90               | 3.05            |
| 3          | 35.99               | 6.50            |
| 4          | 45.51               | 2.56            |
| 5          | 69.75               | 3.00            |
| 6          | 70.90               | 3.22            |
| 7          | 64.01               | 2.71            |
| 8          | 68.66               | 3.05            |
| 9          | 62.99               | 3.24            |
| 10         | 50.76               | 2.84            |
| Mean       | 62.32               | 2.98            |
| Std. Error | 2.91                | 0.08            |

|                         |                |
|-------------------------|----------------|
| Measurement Parameters: |                |
| Conductance             | = 1207 $\mu$ S |
| Current                 | = 6.63 mA      |
| Electric Field          | = 15.03 V/cm   |
| Sample Count Rate       | = 452 kcps     |
| Ref. Count Rate         | = 906 kcps     |

Ag/18pl nAg/nSurf = 4 (Run 10)  
Measurement Completed

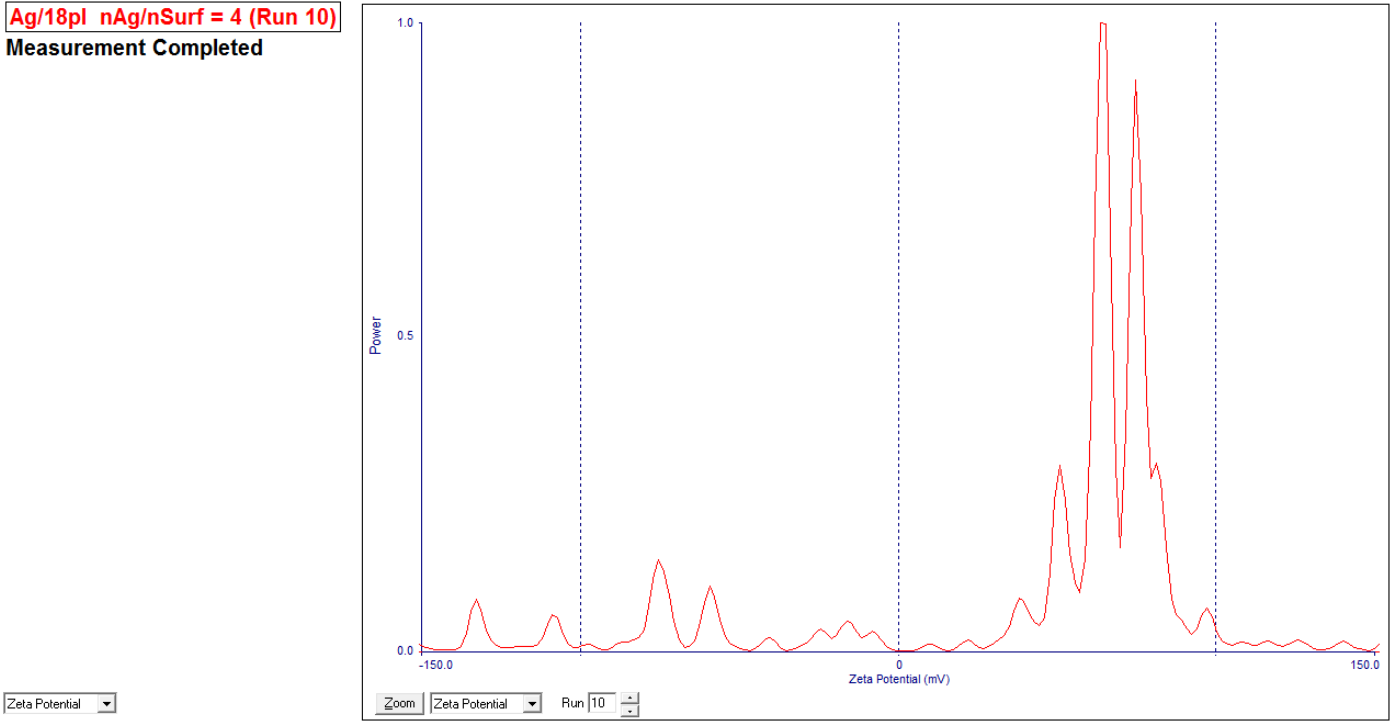

| Run        | Zeta Potential (mV) | Half Width (mV) |
|------------|---------------------|-----------------|
| 1          | 71.83               | 2.79            |
| 2          | 76.46               | 6.07            |
| 3          | 76.04               | 3.56            |
| 4          | 55.73               | 2.71            |
| 5          | 64.67               | 2.86            |
| 6          | 65.59               | 3.16            |
| 7          | 69.71               | 4.04            |
| 8          | 75.16               | 2.63            |
| 9          | 72.64               | 5.87            |
| 10         | 63.66               | 3.21            |
| Mean       | 69.15               | 3.69            |
| Std. Error | 2.11                | 0.40            |

|                         |                |
|-------------------------|----------------|
| Measurement Parameters: |                |
| Conductance             | = 1113 $\mu$ S |
| Current                 | = 6.12 mA      |
| Electric Field          | = 14.90 V/cm   |
| Sample Count Rate       | = 190 kcps     |
| Ref. Count Rate         | = 876 kcps     |

Ag/18pl nAg/nSurf = 2.7 (Run 10)  
Measurement Completed

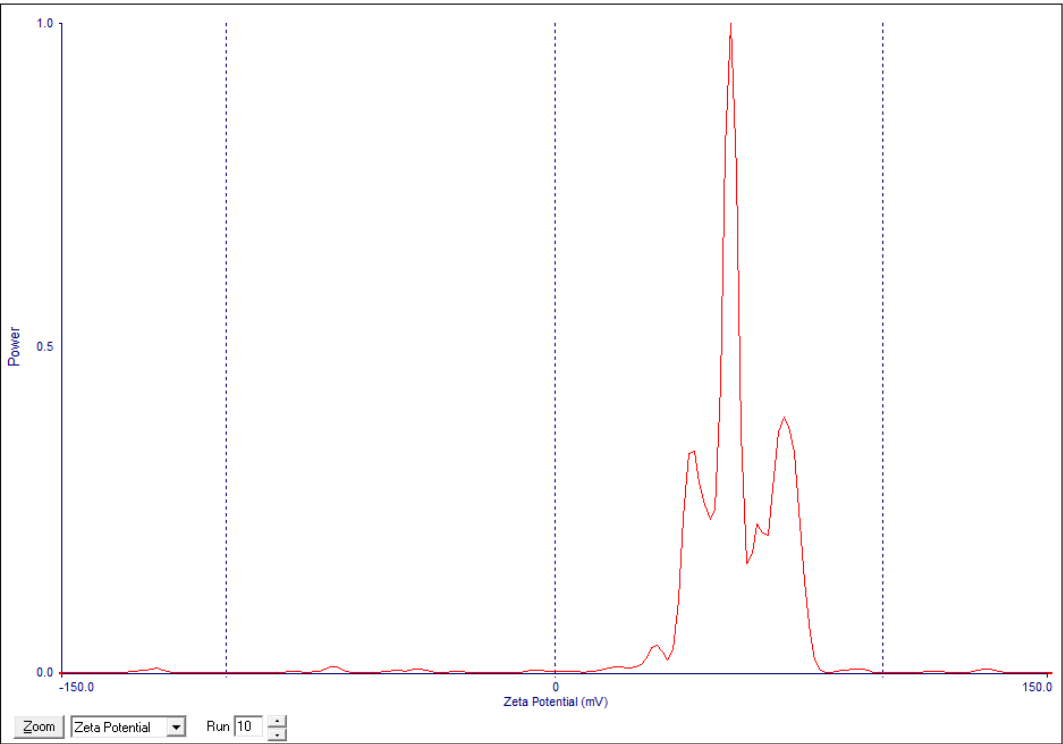

| Run        | Zeta Potential (mV) | Half Width (mV) |
|------------|---------------------|-----------------|
| 1          | 66.58               | 3.41            |
| 2          | 49.34               | 3.03            |
| 3          | 73.27               | 3.29            |
| 4          | 75.01               | 2.86            |
| 5          | 76.89               | 2.88            |
| 6          | 68.64               | 5.15            |
| 7          | 63.98               | 2.76            |
| 8          | 53.55               | 3.04            |
| 9          | 67.32               | 3.28            |
| 10         | 53.71               | 2.82            |
| Mean       | 66.55               | 3.28            |
| Std. Error | 2.81                | 0.25            |

|                         |               |
|-------------------------|---------------|
| Measurement Parameters: |               |
| Conductance             | = 931 $\mu$ S |
| Current                 | = 5.14 mA     |
| Electric Field          | = 14.90 V/cm  |
| Sample Count Rate       | = 202 kcps    |
| Ref. Count Rate         | = 895 kcps    |

Ag/18pl nAg/nSurf = 2 (Run 10)  
Measurement Completed

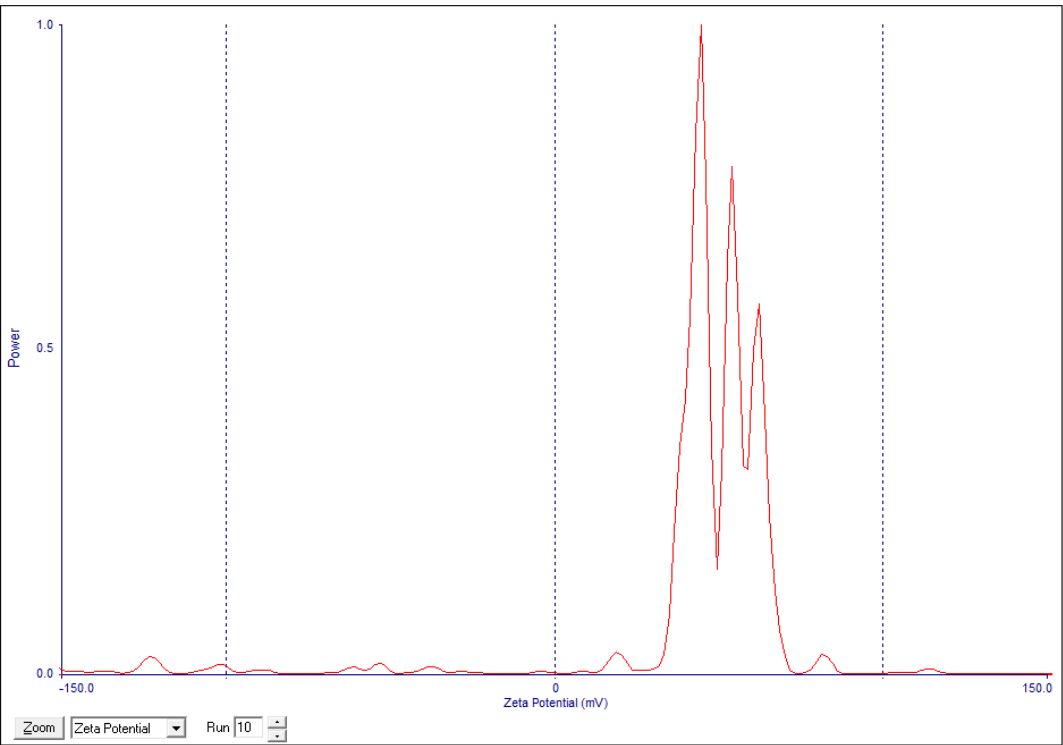

| Run        | Zeta Potential (mV) | Half Width (mV) |
|------------|---------------------|-----------------|
| 1          | 68.01               | 3.05            |
| 2          | 64.01               | 2.89            |
| 3          | 51.95               | 2.96            |
| 4          | 61.71               | 4.22            |
| 5          | 79.43               | 2.77            |
| 6          | 44.71               | 5.04            |
| 7          | 62.38               | 3.03            |
| 8          | 50.96               | 5.87            |
| 9          | 62.53               | 3.43            |
| 10         | 44.58               | 3.22            |
| Mean       | 62.62               | 3.53            |
| Std. Error | 3.17                | 0.37            |

|                         |               |
|-------------------------|---------------|
| Measurement Parameters: |               |
| Conductance             | = 635 $\mu$ S |
| Current                 | = 3.54 mA     |
| Electric Field          | = 14.98 V/cm  |
| Sample Count Rate       | = 336 kcps    |
| Ref. Count Rate         | = 880 kcps    |

Image of the used Zeta potential analyser:

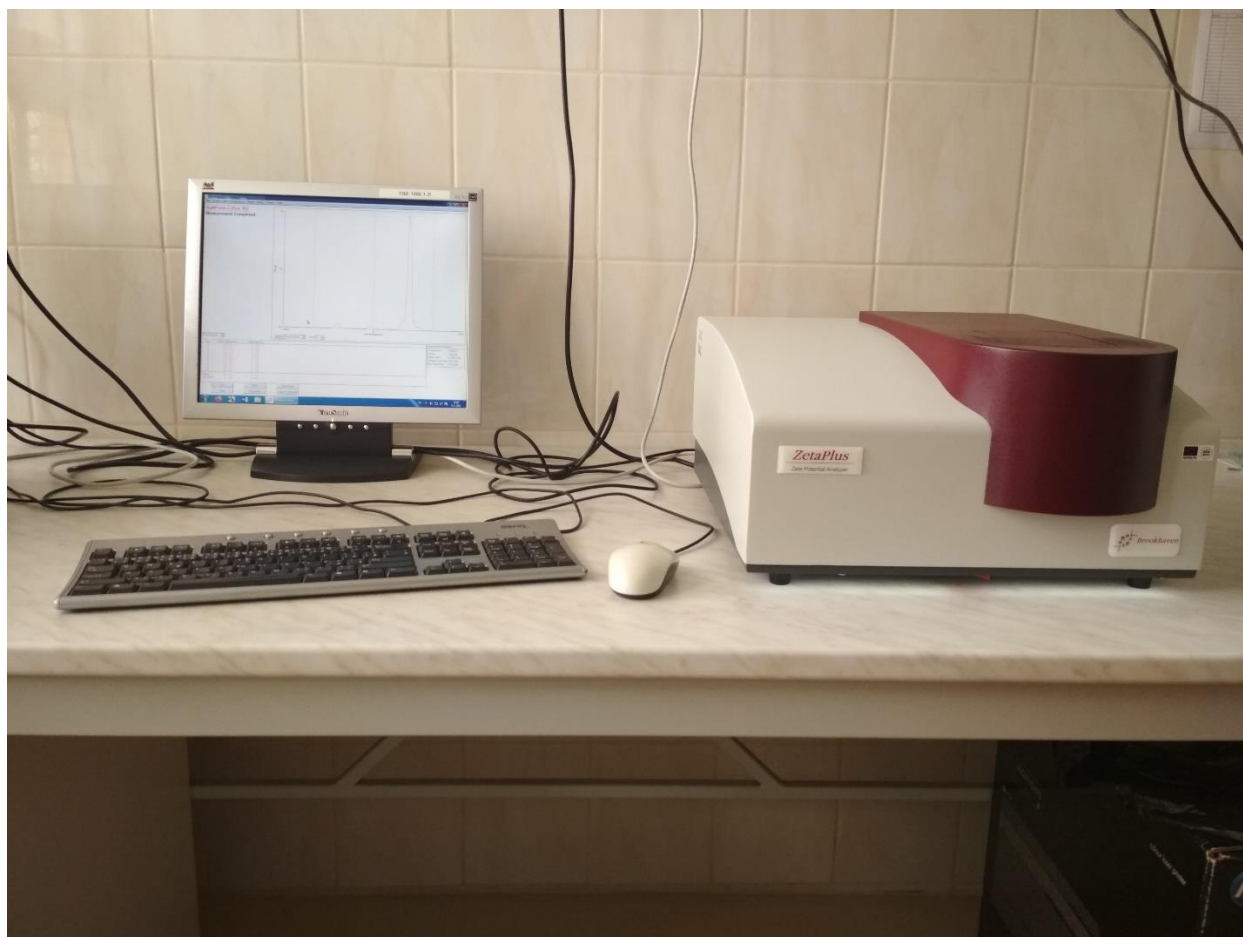

### 3. SEM high resolution images

Ag/14pl

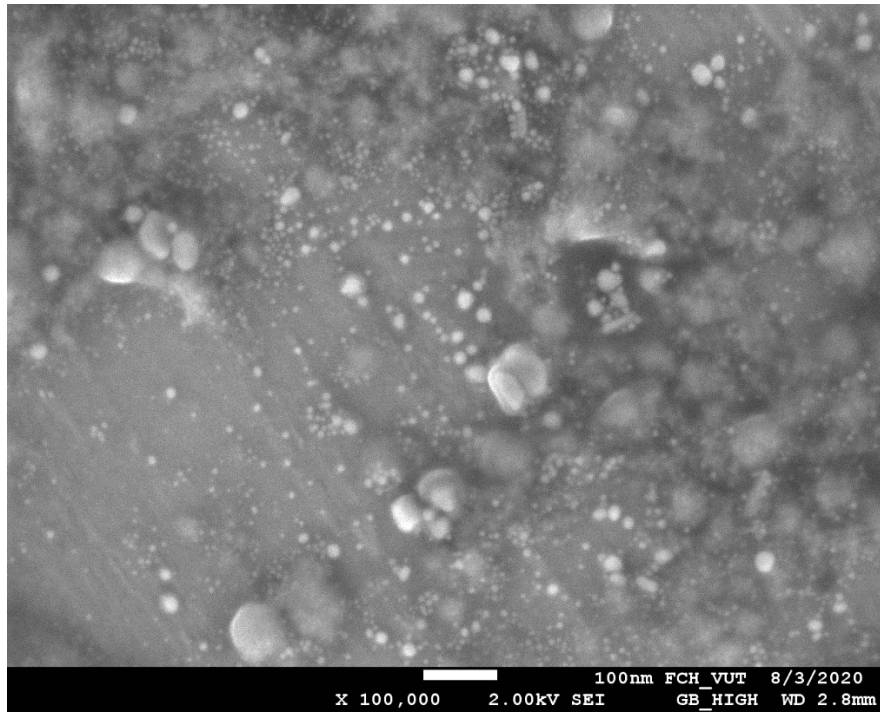

Ag/15pl

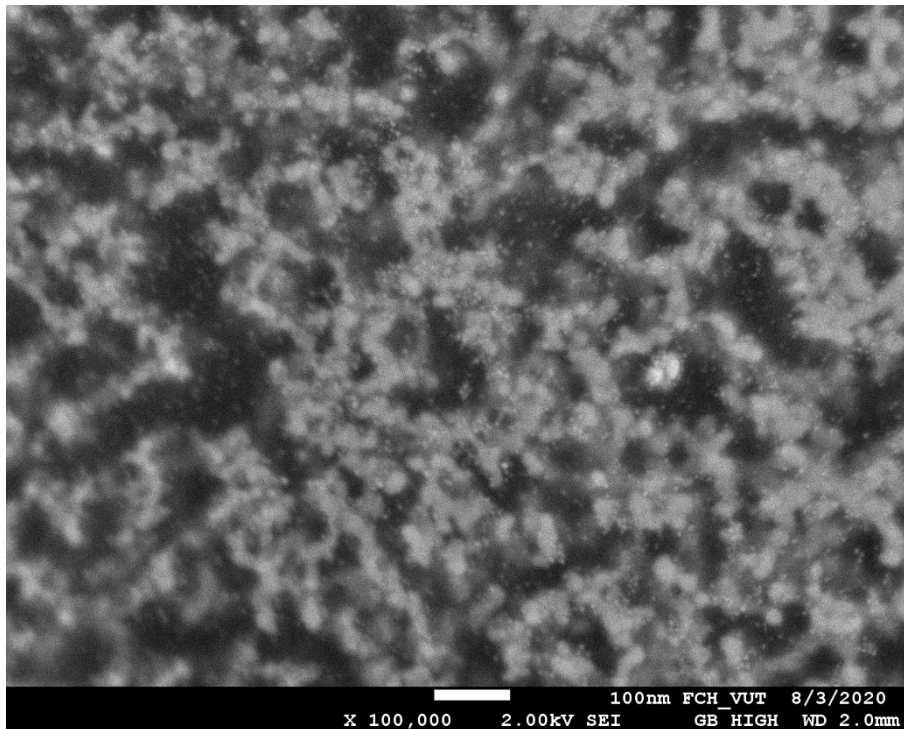

Ag/16pl

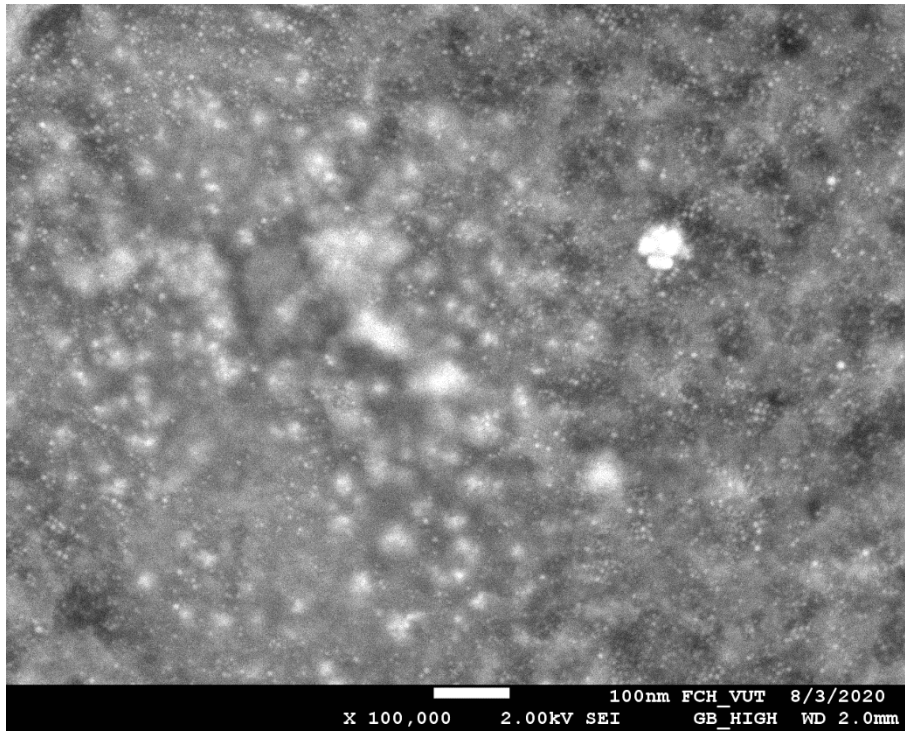

Ag/17pl

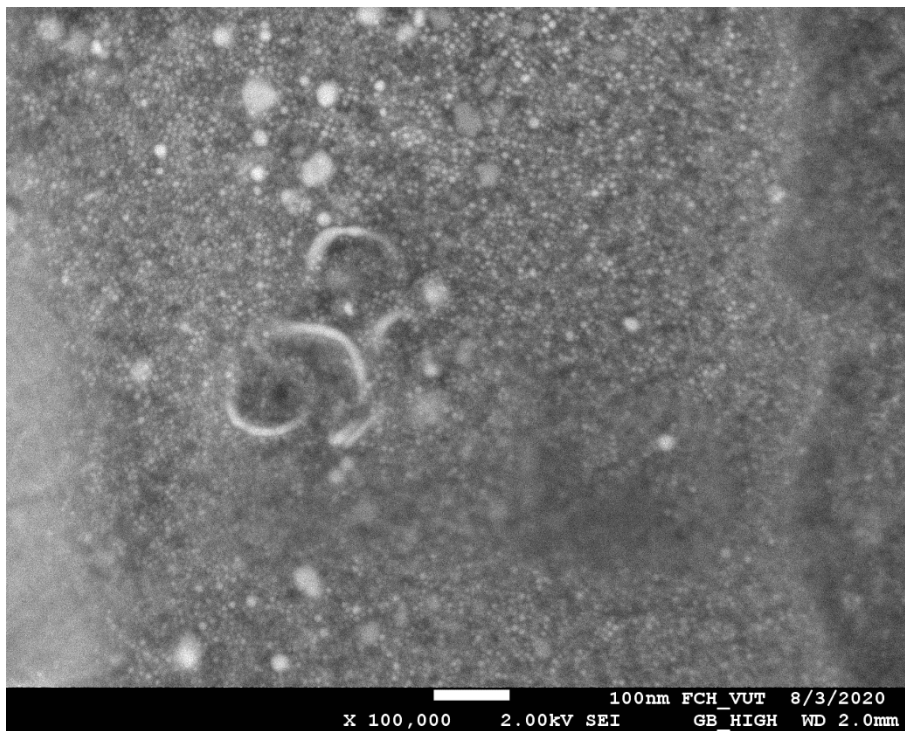

Ag/18p1

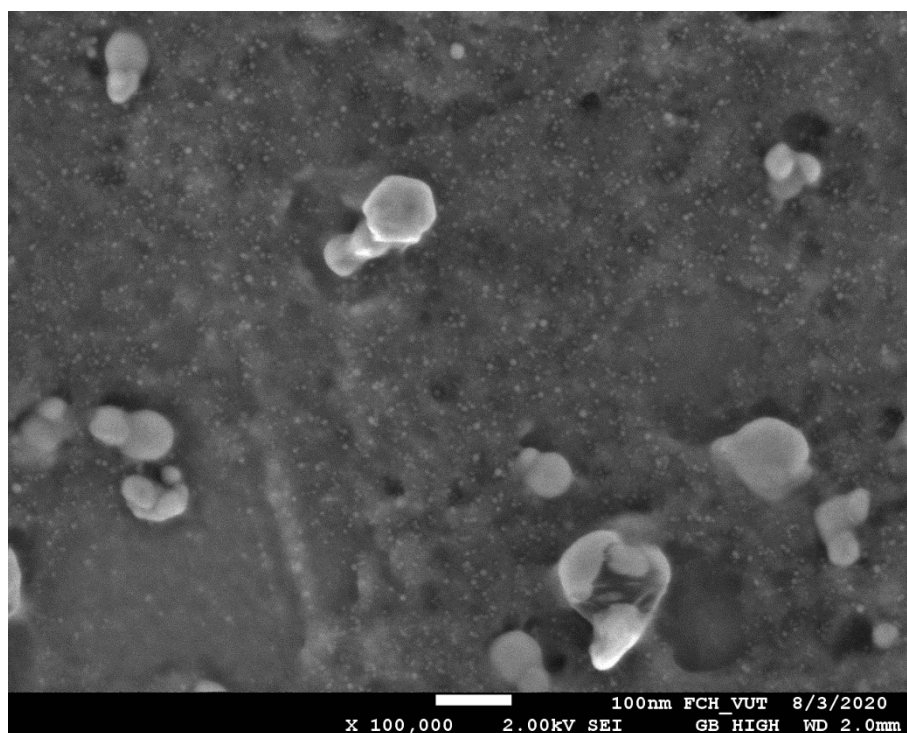

Supplement: s1 [file s1]
